# Supplementary material
Source: publisher figshare collection journal article supplement (https://gsajournals.figshare.com/ndownloader/files/18261014)
Supplement: Supplementary file 1 [file 18261014]

,VARCHAR 15,VARCHAR 200,VARCHAR 30,CHAR 11,BOOLEAN,BOOLEAN,BOOLEAN,BOOLEAN,VARCHAR 255,BOOLEAN,BOOLEAN,BOOLEAN,BOOLEAN,BOOLEAN,VARCHAR 255,"DECIMAL (3, 1)","DECIMAL (3, 1)",BOOLEAN,BOOLEAN,VARCHAR 30,VARCHAR 200,TEXT 23,TEXT 23,TEXT 300,"DECIMAL (4, 2)","DECIMAL (2,2)","DECIMAL (2,2)","DECIMAL (2,1)",DATE YYYY-MM-DD,INT 4,INT 4,VARCHAR 255,VARCHAR 255,VARCHAR 255,VARCHAR 255,VARCHAR 255,VARCHAR 255,VARCHAR 255,VARCHAR 255,VARCHAR 255,VARCHAR 255,VARCHAR 255,VARCHAR 255,VARCHAR 255,VARCHAR 255,,,VARCHAR 255,VARCHAR 255,VARCHAR 255,VARCHAR 255,VARCHAR 255,VARCHAR 255,VARCHAR 255,VARCHAR 255,VARCHAR 255,VARCHAR 255,VARCHAR 255,VARCHAR 255,,,BOOLEAN,BOOLEAN,BOOLEAN,VARCHAR 255,VARCHAR 255,
1,2,3,4,5,7,8,9,10,11,12,13,14,15,16,17,18,19,20,21,22,23,24,25,26,27,28,29,30,31,32,33,34,35,36,37,38,39,40,41,42,43,44,45,46,47,48,49,50,51,52,53,54,55,56,57,58,59,60,61,62,63,64,65,66,67,68,69
id,cgName,fullGeneName,abbrGeneName,flybaseName,28hrHypandrium,28hrPhallus,28hrVLobeSurstylus,28hrCercus,28hrcode,48hrHypandrium,48hrPhallus,48hrSurstylus,48hrVL,48hrCercus,48hrcode,RNAseq24wt,RNAseq28wt,RNAi,FISH,species,strain,primerFor,primerRev,probeSeq,probeCon,260_280,260_230,ulProbeAmount,date,stainTimeMin,geneNumber,28hrimage,48hrimage,28hrimage1,28hrimage2,28hrimage3,28hrimage4,28hrimage5,28hrimage6,28hrimage7,28hrimage8,28hrimage9,28hrimage10,28hrimage11,28hrimage12,28hrimage13,28hrimage14,48hrimage1,48hrimage2,48hrimage3,48hrimage4,48hrimage5,48hrimage6,48hrimage7,48hrimage8,48hrimage9,48hrimage10,48hrimage11,48hrimage12,48hrimage13,48hrimage14,TF,Signaling Molecule,Morphogenic Genes,sex,notes,gene download zip file
1,CG1007,extra macrochaetae,emc,FBgn0000575,0,0,1,1,"surstylus / epandrial ventral lobe, cercus﻿",0,1,0,0,1,"phallus, cercus",474.7,441.82,0,0,Drosophila melanogaster,yw; +; +,TGACCGCTCGCAGCAAAAGA,TTCCGGAGGCACCTGTCTGG,TGACCGCTCGCAGCAAAAGAtatagaaatcgagaacgtaaacgcagaaaacacgctggattaaagtgtttcgtttcgaacatcgacagagtgagaaaacaaagtgaagtgagcgcacaaagccgaaatcaaatcaaattgaaaagccagtcaagagcaatctttaactgaacctcgcaagtaatccggtacgaccgtgtaacaaccgccaagattctactcaaggagcgtaaagcaatcatctccagaatgaagtccctgacggccgtctgCCAGACAGGTGCCTCCGGAA,137.45,1.96,1.99,1.6,2018-09-27,120,1,001_28.jpeg,001_48.jpeg,001_0_00001.jpeg,001_0_00002.jpeg,001_0_00003.jpeg,001_0_00004.jpeg,001_0_00005.jpeg,001_0_00006.jpeg,no_data.jpg,no_data.jpg,no_data.jpg,no_data.jpg,no_data.jpg,no_data.jpg,no_data.jpg,no_data.jpg,001_1_00001.jpeg,001_1_00002.jpeg,001_1_00003.jpeg,no_data.jpg,no_data.jpg,no_data.jpg,no_data.jpg,no_data.jpg,no_data.jpg,no_data.jpg,no_data.jpg,no_data.jpg,no_data.jpg,no_data.jpg,1,0,0,Male,NA,emc.zip
2,CG8669,cryptocephal,crc,FBgn0000370,1,1,1,1,"hypandrium, phallus, surstylus / epandrial ventral lobe, cercus﻿",1,1,1,1,1,"hypandrium, phallus, surstylus, epandrial ventral lobe, cercus",307.3,356.63,0,0,Drosophila melanogaster,yw; +; +,CCGACGAGGACTGGGTTCCA,ACATGCTCCTCGCCCAGCAC,CCGACGAGGACTGGGTTCCAgagcttatcagcagctgttcctcgccaactcatacaaccatcgagccgtctgcggccaagccaaaaaagcgtactcgcacctacgggcgaggtgtggaggatcgaaggatccggaaaaaggagcaaaacaagaacgctgccacccgataccgccagaaaaagaaacttgaaatggagaacGTGCTGGGCGAGGAGCATGT,129.25,2,1.85,3.2,2018-10-17,100,2,002_28.jpeg,002_48.jpeg,002_0_00001.jpeg,002_0_00002.jpeg,002_0_00003.jpeg,002_0_00004.jpeg,002_0_00005.jpeg,002_0_00006.jpeg,no_data.jpg,no_data.jpg,no_data.jpg,no_data.jpg,no_data.jpg,no_data.jpg,no_data.jpg,no_data.jpg,002_1_00001.jpeg,002_1_00002.jpeg,002_1_00003.jpeg,no_data.jpg,no_data.jpg,no_data.jpg,no_data.jpg,no_data.jpg,no_data.jpg,no_data.jpg,no_data.jpg,no_data.jpg,no_data.jpg,no_data.jpg,1,0,0,Male,NA,crc.zip
3,CG8409,Suppressor of variegation 205,Su(var)205,FBgn0003607,1,1,1,1,"hypandrium, phallus, surstylus / epandrial ventral lobe, cercus﻿",1,1,1,1,1,"hypandrium, phallus, surstylus, epandrial ventral lobe, cercus",360.7,275.44,0,0,Drosophila melanogaster,yw; +; +,GCGGAGCAGGACACCATTCC,ACCAGGATAGGCGCTCTTCG,GCGGAGCAGGACACCATTCCcgtttcaggatctaccggattcgatcgcggcctggaggccgaaaagatcttgggtgcctccgacaataatggccgcctgacattcctcattcagttcaaaggcgtggaccaagcagaaatggtgccctcctcagtggccaatgaaaaaatcccacgaatggtaatccacttctaCGAAGAGCGCCTATCCTGGT,94.7,1.98,1.79,3.4,2018-10-17,100,3,003_28.jpeg,003_48.jpeg,003_0_00001.jpeg,003_0_00002.jpeg,003_0_00003.jpeg,003_0_00004.jpeg,003_0_00005.jpeg,003_0_00006.jpeg,no_data.jpg,no_data.jpg,no_data.jpg,no_data.jpg,no_data.jpg,no_data.jpg,no_data.jpg,no_data.jpg,003_1_00001.jpeg,003_1_00002.jpeg,003_1_00003.jpeg,003_1_00004.jpeg,no_data.jpg,no_data.jpg,no_data.jpg,no_data.jpg,no_data.jpg,no_data.jpg,no_data.jpg,no_data.jpg,no_data.jpg,no_data.jpg,1,0,0,Male,NA,Su_var_3-7.zip
4,CG10016,drumstick,drm,FBgn0024244,0,0,1,0,surstylus / epandrial ventral lobe,1,0,0,1,0,"hypandrium, epandrial ventral lobe",196.3,267.91,0,0,Drosophila melanogaster,yw; +; +,GCGAATCGACAACGATGACTGC,TGTGCTGGCGCAGATTGTCC,GCGAATCGACAACGATGACTGCcggtccgatttccgccgcaagatgcgtccgaagtgcgagttcatttgcaagtactgccagcggcgattcaccaagccgtacaacctgatgatccacgagcgcacccacaagtcccctgagatcacctattcgtgcgaggtgtgcggcaagtactttaagcagcgGGACAATCTGCGCCAGCACA,131.55,1.98,1.99,1.6,2018-09-27,60,4,004_28.jpeg,004_48.jpeg,004_0_00001.jpeg,004_0_00002.jpeg,004_0_00003.jpeg,004_0_00004.jpeg,no_data.jpg,no_data.jpg,no_data.jpg,no_data.jpg,no_data.jpg,no_data.jpg,no_data.jpg,no_data.jpg,no_data.jpg,no_data.jpg,004_1_00001.jpeg,004_1_00002.jpeg,004_1_00003.jpeg,no_data.jpg,no_data.jpg,no_data.jpg,no_data.jpg,no_data.jpg,no_data.jpg,no_data.jpg,no_data.jpg,no_data.jpg,no_data.jpg,no_data.jpg,1,0,0,Male,NA,drm.zip
5,CG17921,HMG protein Z,HmgZ,FBgn0010228,1,1,1,1,"hypandrium, phallus, surstylus / epandrial ventral lobe, cercus﻿",1,1,1,1,1,"hypandrium, phallus, surstylus, epandrial ventral lobe, cercus",307.6,243.75,0,0,Drosophila melanogaster,yw; +; +,TGGGAGCAGAAGGCCATCAA,TGCGATGGATGCAACCGTGT,TGGGAGCAGAAGGCCATCAAaatgaaggaggagtacaacaaggcggtaaaggagtacgaggccaatggcggcaccgattcgggagcgcccaagaagcgaaagaaggcggccgccaagccagccaagaaggccaagaagaaagagtcctccgaggaggaggaggaggacgagagcgagtagACACGGTTGCATCCATCGCA,135.6,1.98,1.95,1.6,2018-09-27,60,5,005_28.jpeg,005_48.jpeg,005_0_00001.jpeg,005_0_00002.jpeg,005_0_00003.jpeg,005_0_00004.jpeg,005_0_00005.jpeg,005_0_00006.jpeg,no_data.jpg,no_data.jpg,no_data.jpg,no_data.jpg,no_data.jpg,no_data.jpg,no_data.jpg,no_data.jpg,005_1_00001.jpeg,005_1_00002.jpeg,005_1_00003.jpeg,no_data.jpg,no_data.jpg,no_data.jpg,no_data.jpg,no_data.jpg,no_data.jpg,no_data.jpg,no_data.jpg,no_data.jpg,no_data.jpg,no_data.jpg,1,0,0,Male,NA,HmgZ.zip
6,CG10021,brother of odd with entrails limited,bowl,FBgn0004893,1,1,1,1,"hypandrium, phallus, surstylus / epandrial ventral lobe, cercus﻿",1,1,1,1,1,"hypandrium, phallus, surstylus, epandrial ventral lobe, cercus",199.5,235.72,0,0,Drosophila melanogaster,yw; +; +,GCCCACGGAAAGCTCATCCA,AGTCCGGCCAAATGCTGCTG,GCCCACGGAAAGCTCATCCAgcgagatctccggcggaggaggcggtgcgatacccatgctgcgaccttcccggatggatcagttcatgaactcgatggcggcggcagcggcggcggtgggtggtggcggtcttcctggtgcggcggataggaacggcggatccggaggatcggatggtggctcccagaatggcaacggcgattcgcgcaactcatcggccagccggatctcagcgtatgaaacacagctggcctatcAGCAGCATTTGGCCGGACTG,217.5,2.02,2.03,1.6,2018-09-27,60,6,006_28.jpeg,006_48.jpeg,006_0_00001.jpeg,006_0_00002.jpeg,006_0_00003.jpeg,006_0_00004.jpeg,006_0_00005.jpeg,006_0_00006.jpeg,006_0_00007.jpeg,006_0_00008.jpeg,no_data.jpg,no_data.jpg,no_data.jpg,no_data.jpg,no_data.jpg,no_data.jpg,006_1_00001.jpeg,006_1_00002.jpeg,006_1_00003.jpeg,006_1_00004.jpeg,006_1_00005.jpeg,006_1_00006.jpeg,006_1_00007.jpeg,006_1_00008.jpeg,006_1_00009.jpeg,no_data.jpg,no_data.jpg,no_data.jpg,no_data.jpg,no_data.jpg,1,0,0,Male,images 28h #4-9 and 48h #4-9 were processed independantly and had staining time of 118 min,bowl.zip
7,CG6143,Protein on ecdysone puffs,Pep,FBgn0004401,1,1,1,1,"hypandrium, phallus, surstylus / epandrial ventral lobe, cercus﻿",1,1,1,1,1,"hypandrium, phallus, surstylus, epandrial ventral lobe, cercus",282,230.01,0,0,Drosophila melanogaster,yw; +; +,CTGCCCCAGAAGCGCAAGAA,GATGCAGTCCTCGGGGTCCA,CTGCCCCAGAAGCGCAAGAAgaagccggtcaagaaggagggcgaagcagccgatggcgaggctaagaaggagggtgccggcgatggcgagggtgccgaaggtgatgaagccgagggagaagaggccaaggagggtgaggaagctgctgacgagacaaaggagggcgatgagctaaacgagagccaagaggaagaggaagtggcactgcccgTGGACCCCGAGGACTGCATC,146.3,2.05,2.01,1.6,2018-09-27,120,7,007_28.jpeg,007_48.jpeg,007_0_00001.jpeg,007_0_00002.jpeg,007_0_00003.jpeg,007_0_00004.jpeg,007_0_00005.jpeg,007_0_00006.jpeg,007_0_00007.jpeg,no_data.jpg,no_data.jpg,no_data.jpg,no_data.jpg,no_data.jpg,no_data.jpg,no_data.jpg,007_1_00001.jpeg,007_1_00002.jpeg,007_1_00003.jpeg,007_1_00004.jpeg,007_1_00005.jpeg,007_1_00006.jpeg,007_1_00007.jpeg,no_data.jpg,no_data.jpg,no_data.jpg,no_data.jpg,no_data.jpg,no_data.jpg,no_data.jpg,1,0,0,Male,NA,Pep.zip
8,CG9415,X box binding protein-1,Xbp1,FBgn0021872,1,1,1,1,"hypandrium, phallus, surstylus / epandrial ventral lobe, cercus﻿",1,1,1,1,1,"hypandrium, phallus, surstylus, epandrial ventral lobe, cercus",179.4,220.16,0,0,Drosophila melanogaster,yw; +; +,GACATCGCGTGACCGCAAGA,GGCGTTGGATTGGCTGATGC,GACATCGCGTGACCGCAAGAaggcacgcatggaggagatggactacgagatcaaggagctgacagacagaacggaaatactacagaacaagtgcgatagcctgcaggccatcaacgagtcactgctggccaagaaccacaagctggactcggagctggagctgctgcgccaagaactcgccgaactgaagcagcaacagcagcacaacaccagatGCATCAGCCAATCCAACGCC,53.75,2.05,1.9,1.6,2018-09-27,120,8,008_28.jpeg,008_48.jpeg,008_0_00001.jpeg,008_0_00002.jpeg,008_0_00003.jpeg,008_0_00004.jpeg,008_0_00005.jpeg,no_data.jpg,no_data.jpg,no_data.jpg,no_data.jpg,no_data.jpg,no_data.jpg,no_data.jpg,no_data.jpg,no_data.jpg,008_1_00001.jpeg,008_1_00002.jpeg,008_1_00003.jpeg,no_data.jpg,no_data.jpg,no_data.jpg,no_data.jpg,no_data.jpg,no_data.jpg,no_data.jpg,no_data.jpg,no_data.jpg,no_data.jpg,no_data.jpg,1,0,0,Male,NA,Xbp1.zip
9,CG2125,cubitus interruptus,ci,FBgn0004859,1,0,1,1,"hypandrium, surstylus / epandrial ventral lobe, cercus﻿",1,1,1,1,1,"hypandrium, phallus, surstylus, epandrial ventral lobe, cercus",171.3,163.76,0,0,Drosophila melanogaster,yw; +; +,GCGACCGAACCCCTCGTGTA,GGACGATGGAGGTGGGGGTA,GCGACCGAACCCCTCGTGTAactcgactgcatccttttatgatcccatttcaccagggtgctcacggcgctctagccaaatgtcaaatggtgctaactgcaattcatttacttccacatcaggactacccgtattaaataaggaatcgaacaaaagcttaaatgcatgtattaataaacctaatatcggggttcagggtgttggaatttacaatagcagtcTACCCCCACCTCCATCGTCC,138.65,2,1.82,2,2018-10-23,128,9,009_28.jpeg,009_48.jpeg,009_0_00001.jpeg,009_0_00002.jpeg,009_0_00003.jpeg,009_0_00004.jpeg,009_0_00005.jpeg,009_0_00006.jpeg,009_0_00007.jpeg,009_0_00008.jpeg,009_0_00009.jpeg,no_data.jpg,no_data.jpg,no_data.jpg,no_data.jpg,no_data.jpg,009_1_00001.jpeg,009_1_00002.jpeg,009_1_00003.jpeg,no_data.jpg,no_data.jpg,no_data.jpg,no_data.jpg,no_data.jpg,no_data.jpg,no_data.jpg,no_data.jpg,no_data.jpg,no_data.jpg,no_data.jpg,1,0,0,Male,NA,ci.zip
10,CG11648,Abdominal B,Abd-B,FBgn0000015,1,1,1,0,"hypandrium, phallus, surstylus / epandrial ventral lobe",1,1,1,1,0,"hypandrium, phallus, surstylus, epandrial ventral lobe",120.1,135.56,0,0,Drosophila melanogaster,yw; +; +,ACTCACAGCGCCAGGCCAAT,TGGGGTTGGGATTCGAGCTG,ACTCACAGCGCCAGGCCAATcagcagaacaacaacaacaattcgagcagcaaccacaaccacgcgcaggcgacccagcagcaccacagcggccaccacctgaaccttagcctgaacatgggtcaccatgccgccaagatgcaccagtgacccttggacaacagcagcgctggcgccatgggctttgccacctactagcagttagccaatccgagttcgggtaacccCAGCTCGAATCCCAACCCCA,153,1.97,1.88,1.6,2018-10-09,45,10,010_28.jpeg,010_48.jpeg,010_0_00001.jpeg,010_0_00002.jpeg,010_0_00003.jpeg,010_0_00004.jpeg,010_0_00005.jpeg,010_0_00006.jpeg,010_0_00007.jpeg,010_0_00008.jpeg,no_data.jpg,no_data.jpg,no_data.jpg,no_data.jpg,no_data.jpg,no_data.jpg,010_1_00001.jpeg,010_1_00002.jpeg,010_1_00003.jpeg,010_1_00004.jpeg,010_1_00005.jpeg,010_1_00006.jpeg,no_data.jpg,no_data.jpg,no_data.jpg,no_data.jpg,no_data.jpg,no_data.jpg,no_data.jpg,no_data.jpg,1,0,0,Male,NA,Abd-B.zip
11,CG1897,Drop,Dr,FBgn0000492,1,0,1,1,"hypandrium, surstylus / epandrial ventral lobe, cercus",1,0,1,1,0,"hypandrium, surstylus, epandrial ventral lobe",129.9,122.86,0,0,Drosophila melanogaster,yw; +; +,GTGCAACCTGCGGAAGCACA,CAGCGCCGCCATCTTGATCT,GTGCAACCTGCGGAAGCACAagcccaaccggaagccccgcacccccttcacaacacagcagctgctctcgctggagaagaagttccgggagaagcagtacctgagcatcgccgaacgggcggagttctcctcctcgctgcggctgacggagacgcaggtgaagatctggttccagaaccgaagggccaaggccaagcgtctccaggaggccgagatcgagaAGATCAAGATGGCGGCGCTG,186.5,2.02,1.94,1.6,2018-10-10,115,11,011_28.jpeg,011_48.jpeg,011_0_00001.jpeg,011_0_00002.jpeg,011_0_00003.jpeg,011_0_00004.jpeg,011_0_00005.jpeg,011_0_00006.jpeg,011_0_00007.jpeg,011_0_00008.jpeg,no_data.jpg,no_data.jpg,no_data.jpg,no_data.jpg,no_data.jpg,no_data.jpg,011_1_00001.jpeg,011_1_00002.jpeg,011_1_00003.jpeg,011_1_00004.jpeg,011_1_00005.jpeg,011_1_00006.jpeg,011_1_00007.jpeg,no_data.jpg,no_data.jpg,no_data.jpg,no_data.jpg,no_data.jpg,no_data.jpg,no_data.jpg,1,0,0,Male,NA,Dr.zip
12,CG1759,caudal,cad,FBgn0000251,0,0,0,1,cercus﻿,0,0,0,0,1,cercus,94.8,114.28,0,0,Drosophila melanogaster,yw; +; +,GCCCCAGCTCAACGAGACCA,GTTGTTGGCGACGGCACTCA,GCCCCAGCTCAACGAGACCAacagcagcatcggcgtcggaggagcaggcggtggcggtggtgttggcggggccaccgatggaggaccaggttccgcaccacccaaccatcagcagcacatcgccgaaggtctgccgtcgccaccgattaccgtttcgggctcggaaatctctagcccgggggcgccgacttctgcctcgtcgccgcatcatcacttggcacaccattTGAGTGCCGTCGCCAACAAC,203,2.01,1.95,1.6,2018-10-10,80,12,012_28.jpeg,012_48.jpeg,012_0_00001.jpeg,012_0_00002.jpeg,012_0_00003.jpeg,012_0_00004.jpeg,012_0_00005.jpeg,012_0_00006.jpeg,012_0_00007.jpeg,no_data.jpg,no_data.jpg,no_data.jpg,no_data.jpg,no_data.jpg,no_data.jpg,no_data.jpg,012_1_00001.jpeg,012_1_00002.jpeg,012_1_00003.jpeg,012_1_00004.jpeg,012_1_00005.jpeg,no_data.jpg,no_data.jpg,no_data.jpg,no_data.jpg,no_data.jpg,no_data.jpg,no_data.jpg,no_data.jpg,no_data.jpg,1,0,0,Male,NA,cad.zip
13,CG7199,Hormone-receptor-like in 78,Hr78,FBgn0015239,1,1,1,1,"hypandrium, phallus, surstylus / epandrial ventral lobe, cercus﻿",1,1,1,1,1,"hypandrium, phallus, surstylus, epandrial ventral lobe, cercus",102.4,111.33,0,0,Drosophila melanogaster,yw; +; +,CCCGAGGATGACGAGGACGA,GCCACTGTCCTCCGCCTCTG,CCCGAGGATGACGAGGACGActcaatggacaacagcagcacgctgtgcttgcagttgctcgccaacagcgccagcaacaacaactcgcagcacctgaactttaatgctggggaagtacccaccgctctgcctaccacctcgacaatggggcttattcagagttcgctggacatgcgggtcatccacaagggactgcagatcctgcagcccatccaaaaccaactggagcgaaatggtaatctgagtgtgaagcccgagtgcgattCAGAGGCGGAGGACAGTGGC,208.5,2.01,1.95,1.6,2018-10-10,115,13,013_28.jpeg,013_48.jpeg,013_0_00001.jpeg,013_0_00002.jpeg,013_0_00003.jpeg,013_0_00004.jpeg,013_0_00005.jpeg,013_0_00006.jpeg,013_0_00007.jpeg,013_0_00008.jpeg,no_data.jpg,no_data.jpg,no_data.jpg,no_data.jpg,no_data.jpg,no_data.jpg,013_1_00001.jpeg,013_1_00002.jpeg,013_1_00003.jpeg,013_1_00004.jpeg,013_1_00005.jpeg,013_1_00006.jpeg,013_1_00007.jpeg,013_1_00008.jpeg,no_data.jpg,no_data.jpg,no_data.jpg,no_data.jpg,no_data.jpg,no_data.jpg,1,0,0,Male,NA,Hr78.zip
14,CG5403,retained,retn,FBgn0004795,1,1,1,1,"hypandrium, phallus, surstylus / epandrial ventral lobe, cercus",0,1,0,0,0,phallus,102.1,96.9,0,0,Drosophila melanogaster,yw; +; +,CAGCAGCTGCGGGATTCCAT,CGGGCGAACTGTGACGATGA,CAGCAGCTGCGGGATTCCATcacccatcgatgggccaccagcaggatgccgcatccgagggcgaaccagaggatgactacgctcacggtgagcacaataccacgggcaactcgtcctccatgcacgacgacagcgaaccgcagcagatgaacggacaccaccaccatcagacccaccatctggacaagtccgacgactcggccattgagaactcacccaccacgtcgaccaccaccggtgggtcggtgggTCATCGTCACAGTTCGCCCG,225,2.05,2.02,1.6,2018-10-10,80,14,014_28.jpeg,014_48.jpeg,014_0_00001.jpeg,014_0_00002.jpeg,014_0_00003.jpeg,014_0_00004.jpeg,014_0_00005.jpeg,014_0_00006.jpeg,014_0_00007.jpeg,014_0_00008.jpeg,no_data.jpg,no_data.jpg,no_data.jpg,no_data.jpg,no_data.jpg,no_data.jpg,014_1_00001.jpeg,014_1_00002.jpeg,014_1_00003.jpeg,014_1_00004.jpeg,014_1_00005.jpeg,014_1_00006.jpeg,014_1_00007.jpeg,014_1_00008.jpeg,no_data.jpg,no_data.jpg,no_data.jpg,no_data.jpg,no_data.jpg,no_data.jpg,1,0,0,Male,images 48h #3-8 were processed independantly and had staining time of 178 min,retn.zip
15,CG15845,Adh transcription factor 1,Adf1,FBgn0000054,1,1,1,1,"hypandrium, phallus, surstylus / epandrial ventral lobe, cercus﻿",1,1,1,1,1,"hypandrium, phallus, surstylus, epandrial ventral lobe, cercus",95.6,93.21,0,0,Drosophila melanogaster,yw; +; +,CGTGGGCAAGGACCAAAAGC,ATGACAGCCGCCCGACAGTT,CGTGGGCAAGGACCAAAAGCcatacttctacgagccgccgctcaagcgagagcgcagtgaggaggagcacagcgacaacatgctcaacaccatcaagattttccaaaacaacgtctcgcaggcggtcagcgccgaggaccagtcgttcggcatggtagtcacggacatgctcaacacgctgggcgtgcgacaaaaggcagaggcgaaggtgcacatcatcaagtatctgacggacatgcagcttctggcacagcacaacaagtactAACTGTCGGGCGGCTGTCAT,230.5,2.01,1.96,1.6,2018-10-10,200,15,015_28.jpeg,015_48.jpeg,015_0_00001.jpeg,015_0_00002.jpeg,015_0_00003.jpeg,015_0_00004.jpeg,015_0_00005.jpeg,015_0_00006.jpeg,no_data.jpg,no_data.jpg,no_data.jpg,no_data.jpg,no_data.jpg,no_data.jpg,no_data.jpg,no_data.jpg,015_1_00001.jpeg,015_1_00002.jpeg,015_1_00003.jpeg,015_1_00004.jpeg,015_1_00005.jpeg,no_data.jpg,no_data.jpg,no_data.jpg,no_data.jpg,no_data.jpg,no_data.jpg,no_data.jpg,no_data.jpg,no_data.jpg,1,0,0,Male,NA,Adf1.zip
16,CG8933,extradenticle,exd,FBgn0000611,1,1,1,1,"hypandrium, phallus, surstylus / epandrial ventral lobe, cercus﻿",1,1,1,1,1,"hypandrium, phallus, surstylus, epandrial ventral lobe, cercus",96.7,93,0,0,Drosophila melanogaster,yw; +; +,TCGAATTGGTTTGGCAACAAGC,GTCGTAGCCGCCCATGCTGT,TCGAATTGGTTTGGCAACAAGCgtattcgctataagaagaacattggtaaggcacaggaggaggccaatttgtatgcggccaagaaggcggctggtgcttcaccgtattccatggccggtccacccagcgggacaaccacacccatgatgtcacccgctccgccacaggattccatgggctatccaatgggctccggcggatacgaccagcagcaaccgtacgacaACAGCATGGGCGGCTACGAC,219,1.99,2,1.6,2018-10-10,160,16,016_28.jpeg,016_48.jpeg,016_0_00001.jpeg,016_0_00002.jpeg,016_0_00003.jpeg,016_0_00004.jpeg,016_0_00005.jpeg,016_0_00006.jpeg,016_0_00007.jpeg,no_data.jpg,no_data.jpg,no_data.jpg,no_data.jpg,no_data.jpg,no_data.jpg,no_data.jpg,016_1_00001.jpeg,016_1_00002.jpeg,016_1_00003.jpeg,016_1_00004.jpeg,016_1_00005.jpeg,016_1_00006.jpeg,no_data.jpg,no_data.jpg,no_data.jpg,no_data.jpg,no_data.jpg,no_data.jpg,no_data.jpg,no_data.jpg,1,0,0,Male,NA,exd.zip
17,CG1856,tramtrack,ttk,FBgn0003870,1,1,1,1,"hypandrium, phallus, surstylus / epandrial ventral lobe, cercus﻿",1,1,1,1,1,"hypandrium, phallus, surstylus, epandrial ventral lobe, cercus",75.6,91.49,0,0,Drosophila melanogaster,yw; +; +,GCGCCAACAAGCCTTCCTCA,CAGTTTGGGCCGCTTCTGGA,GCGCCAACAAGCCTTCCTCAtcgctgcccagagaaaacaccaggtggaaacagcagcagcggcggcggccagcggaatcaaacttaacattatcggaatggcggctggtggagcgcaggtgaaaagcatggtcagcatacccaaactaacgcccattggcaaggtcaacgccgcctccacgccattggtctcgcctgccggctccttttccacagccacggtcaagccgcgcgTCCAGAAGCGGCCCAAACTG,232,2.03,2.08,1.6,2018-10-10,160,17,017_28.jpeg,017_48.jpeg,017_0_00001.jpeg,017_0_00002.jpeg,017_0_00003.jpeg,017_0_00004.jpeg,017_0_00005.jpeg,017_0_00006.jpeg,017_0_00007.jpeg,017_0_00008.jpeg,no_data.jpg,no_data.jpg,no_data.jpg,no_data.jpg,no_data.jpg,no_data.jpg,017_1_00001.jpeg,017_1_00002.jpeg,017_1_00003.jpeg,017_1_00004.jpeg,017_1_00005.jpeg,017_1_00006.jpeg,017_1_00007.jpeg,no_data.jpg,no_data.jpg,no_data.jpg,no_data.jpg,no_data.jpg,no_data.jpg,no_data.jpg,1,0,0,Male,NA,ttk.zip
18,CG8246,Pox neuro,Poxn,FBgn0003130,0,1,1,0,"phallus, surstylus / epandrial ventral lobe",0,1,0,1,0,"phallus, epandrial ventral lobe",71.7,81.97,0,0,Drosophila melanogaster,yw; +; +,ACGCCCACCGTGGTGAAGAA,TTGGCCGCCATATCCATTCG,ACGCCCACCGTGGTGAAGAAgatcatccggctaaaggaggagaacagcggcatgttcgcgtgggaaattcgcgagcagctgcagcagcagcgcgtctgcgatcccagttcggtgccctcgatcagctccatcaaccggattctgcgcaacagcggtctgtggaccgatgagatgacatccagtcagcagaatgccgcagctgctgcagcggcggcagcggcagcggctcatcaggcgggcagtggtccatCGAATGGATATGGCGGCCAA,276,1.98,2,1.6,2018-10-10,80,18,018_28.jpeg,018_48.jpeg,018_0_00001.jpeg,018_0_00002.jpeg,018_0_00003.jpeg,018_0_00004.jpeg,018_0_00005.jpeg,018_0_00006.jpeg,018_0_00007.jpeg,018_0_00008.jpeg,no_data.jpg,no_data.jpg,no_data.jpg,no_data.jpg,no_data.jpg,no_data.jpg,018_1_00001.jpeg,018_1_00002.jpeg,018_1_00003.jpeg,018_1_00004.jpeg,018_1_00005.jpeg,018_1_00006.jpeg,018_1_00007.jpeg,no_data.jpg,no_data.jpg,no_data.jpg,no_data.jpg,no_data.jpg,no_data.jpg,no_data.jpg,1,0,0,Male,NA,Poxn.zip
19,CG7664,cropped,crp,FBgn0001994,1,1,1,1,"hypandrium, phallus, surstylus / epandrial ventral lobe, cercus﻿",1,1,1,1,1,"hypandrium, phallus, surstylus, epandrial ventral lobe, cercus",83.1,80.82,0,0,Drosophila melanogaster,yw; +; +,GCAGTCTGCGGCGACTCCTC,ATGATCTCGGCAGCGGCATC,GCAGTCTGCGGCGACTCCTCgaggatgagctccagatgatcaagcggcagctgtacagcgtggcaaccgcaccgcccggaacagctgtggccgccgcatccggcggcagtagtggcgcctacattccacgtgaggtcatcgagcacaccgataactttgtgcgcagcgaggatttggaggaacttggcggcactgtctcgtatgtggaaatcgatgaaatgactggccagcagcaggtggtcgtgtgctccagcatcgaggagctggaggccGATGCCGCTGCCGAGATCAT,220.5,2.01,1.96,1.6,2018-10-10,160,19,019_28.jpeg,019_48.jpeg,019_0_00001.jpeg,019_0_00002.jpeg,019_0_00003.jpeg,019_0_00004.jpeg,019_0_00005.jpeg,019_0_00006.jpeg,019_0_00007.jpeg,019_0_00008.jpeg,no_data.jpg,no_data.jpg,no_data.jpg,no_data.jpg,no_data.jpg,no_data.jpg,019_1_00001.jpeg,019_1_00002.jpeg,019_1_00003.jpeg,019_1_00004.jpeg,019_1_00005.jpeg,019_1_00006.jpeg,019_1_00007.jpeg,019_1_00008.jpeg,no_data.jpg,no_data.jpg,no_data.jpg,no_data.jpg,no_data.jpg,no_data.jpg,1,0,0,Male,NA,crp.zip
20,CG9954,maf-S,maf-S,FBgn0034534,1,1,1,1,"hypandrium, phallus, surstylus / epandrial ventral lobe, cercus﻿",1,1,1,1,1,"hypandrium, phallus, surstylus, epandrial ventral lobe, cercus",83.4,78.93,0,0,Drosophila melanogaster,yw; +; +,GGCCTGAACCGCGAGGAGAT,CCCTCCAGCTCGCTGGGAAT,GGCCTGAACCGCGAGGAGATcgttcggatgaagcagcgccggagaaccttaaagaatcgcggatacgcagccagttgccgcatcaagagaatcgaacagaaggacgagctggagactaagaagtcgtacgagtggacggaactggagcagatgcacgaggacaacgagcaggtgcgccgcgaggtgtccaactggaagaacaagtacaaggcgctgctgcagttcgccatccagaacgagatacccATTCCCAGCGAGCTGGAGGG,210.5,2.02,1.91,1.6,2018-10-10,240,20,020_28.jpeg,020_48.jpeg,020_0_00001.jpeg,020_0_00002.jpeg,020_0_00003.jpeg,020_0_00004.jpeg,020_0_00005.jpeg,no_data.jpg,no_data.jpg,no_data.jpg,no_data.jpg,no_data.jpg,no_data.jpg,no_data.jpg,no_data.jpg,no_data.jpg,020_1_00001.jpeg,020_1_00002.jpeg,020_1_00003.jpeg,020_1_00004.jpeg,no_data.jpg,no_data.jpg,no_data.jpg,no_data.jpg,no_data.jpg,no_data.jpg,no_data.jpg,no_data.jpg,no_data.jpg,no_data.jpg,1,0,0,Male,NA,maf-S.zip
21,CG14938,crooked legs,crol,FBgn0020309,1,1,1,1,"hypandrium, phallus, surstylus / epandrial ventral lobe, cercus﻿",1,1,1,1,1,"hypandrium, phallus, surstylus, epandrial ventral lobe, cercus",80,76.93,0,0,Drosophila melanogaster,yw; +; +,CGGCAACATACAGGCGAGTC,ATGCGGATTGTCGCTCGAAT,CGGCAACATACAGGCGAGTCgccgcacaagtgcacgtactgcaccaagacgttcacgcgcaaggagcacctgacgaaccatgtgcgccagcacacgggcgactccccgcaccgctgctcctactgcaagaagaccttcacgcgcaaggagcacctgacgaaccatgtgcgcctgcacacgggcgactcgccgcacaagtgcgagtactgccagaagacgtttacgcggaaggagcacctcaacaatcatatgcgccagcATTCGAGCGACAATCCGCAT,94,2,1.79,3.4,2018-10-17,60,21,021_28.jpeg,021_48.jpeg,021_0_00001.jpeg,021_0_00002.jpeg,021_0_00003.jpeg,021_0_00004.jpeg,021_0_00005.jpeg,021_0_00006.jpeg,021_0_00007.jpeg,021_0_00008.jpeg,021_0_00009.jpeg,021_0_00010.jpeg,021_0_00011.jpeg,no_data.jpg,no_data.jpg,no_data.jpg,021_1_00001.jpeg,021_1_00002.jpeg,021_1_00003.jpeg,021_1_00004.jpeg,no_data.jpg,no_data.jpg,no_data.jpg,no_data.jpg,no_data.jpg,no_data.jpg,no_data.jpg,no_data.jpg,no_data.jpg,no_data.jpg,1,0,0,Male,NA,crol.zip
22,CG13897,hinge3,hng3,FBgn0035160,1,1,1,1,"hypandrium, phallus, surstylus / epandrial ventral lobe, cercus﻿",1,1,1,1,1,"hypandrium, phallus, surstylus, epandrial ventral lobe, cercus",74.8,74.39,0,0,Drosophila melanogaster,yw; +; +,CAGCTTTCTGCCGCTGATGA,CCTGATCCAAGGCCATTTGC,CAGCTTTCTGCCGCTGATGAagcaaatgacgcccttccagaatgtcttcttcagggccaagatgggggagctactgctgcagacaatgcaacagccgccggtgcagcagcaaccgcagcaacagcagcaactgcaactgcaactgcaacagcaacctgagcaacgacagcagcagcagcagccctcgcaaatgttgttgaaccaacaGCAAATGGCCTTGGATCAGG,117,2.02,1.85,3.2,2018-10-17,25,22,022_28.jpeg,022_48.jpeg,022_0_00001.jpeg,022_0_00002.jpeg,022_0_00003.jpeg,022_0_00004.jpeg,022_0_00005.jpeg,022_0_00006.jpeg,022_0_00007.jpeg,022_0_00008.jpeg,022_0_00009.jpeg,no_data.jpg,no_data.jpg,no_data.jpg,no_data.jpg,no_data.jpg,022_1_00001.jpeg,022_1_00002.jpeg,022_1_00003.jpeg,022_1_00004.jpeg,022_1_00005.jpeg,022_1_00006.jpeg,022_1_00007.jpeg,022_1_00008.jpeg,no_data.jpg,no_data.jpg,no_data.jpg,no_data.jpg,no_data.jpg,no_data.jpg,1,0,0,Male,NA,hng3.zip
23,CG10571,araucan,ara,FBgn0015904,1,1,1,1,"hypandrium, phallus, surstylus / epandrial ventral lobe, cercus﻿",1,1,1,1,1,"hypandrium, phallus, surstylus, epandrial ventral lobe, cercus",65.8,74.38,0,0,Drosophila melanogaster,yw; +; +,CCGACACAGTTGGCTGCAAG,TTGCTGGGTCGTAGCCCCTA,CCGACACAGTTGGCTGCAAGacaccgccgccggcttacatgggtcaccaatcgatgcctctgcagcagcagcagcagcagcaacagcagcagcagcaggcgcagcaccagtatcctccatcggaggcaggacgagatcaacagctgttcaatggggccgcagctccatacctgaggccgcacaccacggcctacgggggttttcTAGGGGCTACGACCCAGCAA,39.5,1.92,1.99,8,2018-10-17,60,23,023_28.jpeg,023_48.jpeg,023_0_00001.jpeg,023_0_00002.jpeg,023_0_00003.jpeg,023_0_00004.jpeg,023_0_00005.jpeg,023_0_00006.jpeg,023_0_00007.jpeg,023_0_00008.jpeg,023_0_00009.jpeg,no_data.jpg,no_data.jpg,no_data.jpg,no_data.jpg,no_data.jpg,023_1_00001.jpeg,023_1_00002.jpeg,023_1_00003.jpeg,023_1_00004.jpeg,023_1_00005.jpeg,023_1_00006.jpeg,023_1_00007.jpeg,no_data.jpg,no_data.jpg,no_data.jpg,no_data.jpg,no_data.jpg,no_data.jpg,no_data.jpg,1,0,0,Male,NA,ara.zip
24,CG3998,Zinc finger protein 30C,zf30C,FBgn0022720,1,1,1,1,"hypandrium, phallus, surstylus / epandrial ventral lobe, cercus﻿",1,1,1,1,1,"hypandrium, phallus, surstylus, epandrial ventral lobe, cercus",86.2,73.01,0,0,Drosophila melanogaster,yw; +; +,CATGAAGGTGCATGGCGAAG,CGGCTCCTTCTTCGAGTGGA,CATGAAGGTGCATGGCGAAGatggcaagctgactttcaagtgcccatgctactgcaacctcttcttcgccaccaaggaacaggccactgagcatgctagggcccagcacaaggaactgctctactgcgaaaaatgcgacaagtacatgaccggacacgacagcctcaagaaccacgaacgcaattTCCACTCGAAGAAGGAGCCG,220,1.96,1.88,1.6,2018-10-17,150,24,024_28.jpeg,024_48.jpeg,024_0_00001.jpeg,024_0_00002.jpeg,024_0_00003.jpeg,024_0_00004.jpeg,024_0_00005.jpeg,024_0_00006.jpeg,024_0_00007.jpeg,no_data.jpg,no_data.jpg,no_data.jpg,no_data.jpg,no_data.jpg,no_data.jpg,no_data.jpg,024_1_00001.jpeg,024_1_00002.jpeg,024_1_00003.jpeg,024_1_00004.jpeg,024_1_00005.jpeg,024_1_00006.jpeg,024_1_00007.jpeg,024_1_00008.jpeg,no_data.jpg,no_data.jpg,no_data.jpg,no_data.jpg,no_data.jpg,no_data.jpg,1,0,0,Male,NA,zf30C.zip
25,CG2050,modulo,mod,FBgn0002780,1,1,1,1,"hypandrium, phallus, surstylus / epandrial ventral lobe, cercus﻿",1,1,1,1,1,"hypandrium, phallus, surstylus, epandrial ventral lobe, cercus",88.3,72.52,0,0,Drosophila melanogaster,yw; +; +,TGGTTGGCCTGATTGGACCT,CGTGTTTGCCCACATTTTCG,TGGTTGGCCTGATTGGACCTaatattaccaaggacgacttaaaaaccttttttgagaaggtagctcccgtggaggcggtgactatatccagtaaccgcctcatgcccagagcttttgtacgtttggcgtcggtcgatgacataccgaaggctcttaaactgcatagcactgagctgttttctcgctttataacggttcgtcggatctcacaagaatcgatttcacgtaccagtgaacttaccttggttgtCGAAAATGTGGGCAAACACG,131.5,1.99,1.99,3.2,2018-10-17,150,25,025_28.jpeg,025_48.jpeg,025_0_00001.jpeg,025_0_00002.jpeg,025_0_00003.jpeg,025_0_00004.jpeg,025_0_00005.jpeg,025_0_00006.jpeg,no_data.jpg,no_data.jpg,no_data.jpg,no_data.jpg,no_data.jpg,no_data.jpg,no_data.jpg,no_data.jpg,025_1_00001.jpeg,025_1_00002.jpeg,025_1_00003.jpeg,025_1_00004.jpeg,025_1_00005.jpeg,025_1_00006.jpeg,no_data.jpg,no_data.jpg,no_data.jpg,no_data.jpg,no_data.jpg,no_data.jpg,no_data.jpg,no_data.jpg,1,0,0,Male,NA,mod.zip
26,CG9015,engrailed,en,FBgn0000577,0,1,1,1,"phallus, surstylus / epandrial ventral lobe, cercus﻿",0,1,1,1,1,"phallus, surstylus, epandrial ventral lobe, cercus",63.5,71.77,0,0,Drosophila melanogaster,yw; +; +,TCGCTGGCCTTTTCCATCTC,CAGCATCATGGCCGCAGTAG,TCGCTGGCCTTTTCCATCTCcaacatcctgagcgatcgttttggagatgtccagaagccgggcaagtccatggagaatcaggccagcatcttccgccccttcgaggcgaatcgttcccagactgccacgccctccgccttcacaagagtggatctgctcgagtttagccggcaacagcaggctgccgccgcagccgCTACTGCGGCCATGATGCTG,139,2,1.94,3.2,2018-10-17,90,26,026_28.jpeg,026_48.jpeg,026_0_00001.jpeg,026_0_00002.jpeg,026_0_00003.jpeg,026_0_00004.jpeg,026_0_00005.jpeg,026_0_00006.jpeg,026_0_00007.jpeg,026_0_00008.jpeg,no_data.jpg,no_data.jpg,no_data.jpg,no_data.jpg,no_data.jpg,no_data.jpg,026_1_00001.jpeg,026_1_00002.jpeg,026_1_00003.jpeg,026_1_00004.jpeg,026_1_00005.jpeg,026_1_00006.jpeg,026_1_00007.jpeg,026_1_00008.jpeg,no_data.jpg,no_data.jpg,no_data.jpg,no_data.jpg,no_data.jpg,no_data.jpg,1,0,0,Male,NA,en.zip
27,CG8396,Single stranded-binding protein c31A,Ssb-c31a,FBgn0015299,1,1,1,1,"hypandrium, phallus, surstylus / epandrial ventral lobe, cercus﻿",1,1,1,1,1,"hypandrium, phallus, surstylus, epandrial ventral lobe, cercus",103.2,71.03,0,0,Drosophila melanogaster,yw; +; +,GCAAGCAAGAAGGCGAAGGA,ATCGCGCGGGTGACTTCTT,GCAAGCAAGAAGGCGAAGGAatctgatgctccaaattcagatccaaaagattcgggcgaaaatggtgctacatcttggaccctggaaggacttcgccaggtgcgaatcaacgagttccgcggtcgcaaatcggtggacattcgagagttctacgataagggcggccaaattcttcccggcaagaagggcatctccctatctttaattcaatggaagaaactccttgaagtggccgAAGAAGTCACCCGCGCGAT,95,1.98,2.14,3.2,2018-10-17,195,27,027_28.jpeg,027_48.jpeg,027_0_00001.jpeg,027_0_00002.jpeg,027_0_00003.jpeg,027_0_00004.jpeg,027_0_00005.jpeg,027_0_00006.jpeg,027_0_00007.jpeg,027_0_00008.jpeg,no_data.jpg,no_data.jpg,no_data.jpg,no_data.jpg,no_data.jpg,no_data.jpg,027_1_00001.jpeg,027_1_00002.jpeg,027_1_00003.jpeg,027_1_00004.jpeg,027_1_00005.jpeg,027_1_00006.jpeg,027_1_00007.jpeg,027_1_00008.jpeg,no_data.jpg,no_data.jpg,no_data.jpg,no_data.jpg,no_data.jpg,no_data.jpg,1,0,0,Male,NA,Ssb-c31a.zip
28,CG7959,Big brother,Bgb,FBgn0013753,1,1,1,1,"hypandrium, phallus, surstylus / epandrial ventral lobe, cercus﻿",1,1,1,1,1,"hypandrium, phallus, surstylus, epandrial ventral lobe, cercus",65.8,70.08,0,0,Drosophila melanogaster,yw; +; +,CGACTGCGTGAGTTCGAGGA,ACTGCTGGTGATGCGTCTGC,CGACTGCGTGAGTTCGAGGAcactaagcgcgcctaccgtgacaatcgacaggacgagatggaggcagtgcgacggggcgtggcctccggaggcattggcgttggcgccagcatgtggcgtcgttagttggacctgtggacggctcctgggccgtcccatccgcagctgcctccccagcagcaGCAGACGCATCACCAGCAGT,116,1.96,2.05,3.2,2018-10-17,195,28,028_28.jpeg,028_48.jpeg,028_0_00001.jpeg,028_0_00002.jpeg,028_0_00003.jpeg,028_0_00004.jpeg,028_0_00005.jpeg,028_0_00006.jpeg,028_0_00007.jpeg,no_data.jpg,no_data.jpg,no_data.jpg,no_data.jpg,no_data.jpg,no_data.jpg,no_data.jpg,028_1_00001.jpeg,028_1_00002.jpeg,028_1_00003.jpeg,028_1_00004.jpeg,028_1_00005.jpeg,028_1_00006.jpeg,028_1_00007.jpeg,028_1_00008.jpeg,028_1_00009.jpeg,028_1_00010.jpeg,028_1_00011.jpeg,no_data.jpg,no_data.jpg,no_data.jpg,1,0,0,Male,NA,Bgb.zip
29,CG3758,escargot,esg,FBgn0001981,1,1,1,1,"hypandrium, phallus, surstylus / epandrial ventral lobe, cercus﻿",1,1,1,1,1,"hypandrium, phallus, surstylus, epandrial ventral lobe, cercus",64.1,69.92,0,0,Drosophila melanogaster,yw; +; +,GTTACCAGTGCCCGGATTGC,TTGCCGCACAGATTGCACTT,GTTACCAGTGCCCGGATTGCcagaaatcttactccaccttctccgggctgaccaaacatcagcagttccattgcccggccgccgagggtaatcaggtgaagaagtccttcagctgcaaggattgtgacaagacctatgtttcgttgggtgccctcaagatgcacattcgcacccacacgttgccctgcAAGTGCAATCTGTGCGGCAA,51.5,1.93,1.88,6.4,2018-10-17,110,29,029_28.jpeg,029_48.jpeg,029_0_00001.jpeg,029_0_00002.jpeg,029_0_00003.jpeg,029_0_00004.jpeg,029_0_00005.jpeg,029_0_00006.jpeg,no_data.jpg,no_data.jpg,no_data.jpg,no_data.jpg,no_data.jpg,no_data.jpg,no_data.jpg,no_data.jpg,029_1_00001.jpeg,029_1_00002.jpeg,029_1_00003.jpeg,029_1_00004.jpeg,029_1_00005.jpeg,029_1_00006.jpeg,029_1_00007.jpeg,no_data.jpg,no_data.jpg,no_data.jpg,no_data.jpg,no_data.jpg,no_data.jpg,no_data.jpg,1,0,0,Male,NA,esg.zip
30,CG2244,MTA1-like,MTA1-like,FBgn0027951,1,1,1,1,"hypandrium, phallus, surstylus / epandrial ventral lobe, cercus﻿",1,1,1,1,1,"hypandrium, phallus, surstylus, epandrial ventral lobe, cercus",68.5,69.68,0,0,Drosophila melanogaster,yw; +; +,CGGCAGTCGCTACCAGTGTG,AGGGCTGCTTCACCGAACTG,CGGCAGTCGCTACCAGTGTGatatacccgccaagctcaaggacaccgccaccgacgaccgcaagctggaggaactcgaatcgctggtgtggacgccggagcacagcctgaccgaccgcaagatagaccagttcttggtcgtgtcacgctccatcggcaccttcgcccgcgccctggactgcagCAGTTCGGTGAAGCAGCCCT,262,2.03,1.95,1.6,2018-10-17,195,30,030_28.jpeg,030_48.jpeg,030_0_00001.jpeg,030_0_00002.jpeg,030_0_00003.jpeg,030_0_00004.jpeg,030_0_00005.jpeg,030_0_00006.jpeg,no_data.jpg,no_data.jpg,no_data.jpg,no_data.jpg,no_data.jpg,no_data.jpg,no_data.jpg,no_data.jpg,030_1_00001.jpeg,030_1_00002.jpeg,030_1_00003.jpeg,030_1_00004.jpeg,030_1_00005.jpeg,030_1_00006.jpeg,no_data.jpg,no_data.jpg,no_data.jpg,no_data.jpg,no_data.jpg,no_data.jpg,no_data.jpg,no_data.jpg,1,0,0,Male,NA,MTA1-like.zip
31,CG9045,Myb oncogene-like,Myb,FBgn0002914,1,1,1,1,"hypandrium, phallus, surstylus / epandrial ventral lobe, cercus﻿",1,1,1,1,1,"hypandrium, phallus, surstylus, epandrial ventral lobe, cercus",82.1,67.97,0,0,Drosophila melanogaster,yw; +; +,TCAAGCAGCTGGTGGAGACG,GCGGCACTGTTTCCCAATTC,TCAAGCAGCTGGTGGAGACGcacggtgagaactgggagattatcggaccgcatttcaaggatcgcctggaacagcaagtgcagcagcgttgggccaaagtcctcaatccggagctaatcaagggcccgtggacgcgggacgaggacgacatggttattaagctggtgcgcaacttcgggcccaagaaatggacactaattgcacgatatctgaacggacGAATTGGGAAACAGTGCCGC,368,1.98,2.06,2,2018-10-23,116,31,031_28.jpeg,031_48.jpeg,031_0_00001.jpeg,031_0_00002.jpeg,031_0_00003.jpeg,031_0_00004.jpeg,031_0_00005.jpeg,031_0_00006.jpeg,031_0_00007.jpeg,031_0_00008.jpeg,no_data.jpg,no_data.jpg,no_data.jpg,no_data.jpg,no_data.jpg,no_data.jpg,031_1_00001.jpeg,031_1_00002.jpeg,031_1_00003.jpeg,031_1_00004.jpeg,031_1_00005.jpeg,no_data.jpg,no_data.jpg,no_data.jpg,no_data.jpg,no_data.jpg,no_data.jpg,no_data.jpg,no_data.jpg,no_data.jpg,1,0,0,Male,NA,Myb.zip
32,CG8367,combgap,cg,FBgn0000289,1,1,1,1,"hypandrium, phallus, surstylus / epandrial ventral lobe, cercus﻿",1,1,1,1,1,"hypandrium, phallus, surstylus, epandrial ventral lobe, cercus",74.1,67.4,0,0,Drosophila melanogaster,yw; +; +,GCACTTCACTTGCGCCTTCA,CGTGGTCTGCGACATCACCT,GCACTTCACTTGCGCCTTCAcactggcgacaagagcctaatgacagatctgtgtgccttgacagccgcgctgccgggtcacttcttgagcacggctagcctgaatccgggcaccgtggtcacggccaatccgaatctggtgggccagagccctgtgccagtgcagatcatatcgtccaccggtcAGGTGATGTCGCAGACCACG,440,2.02,2.21,2,2018-10-23,240,32,032_28.jpeg,032_48.jpeg,032_0_00001.jpeg,032_0_00002.jpeg,032_0_00003.jpeg,032_0_00004.jpeg,032_0_00005.jpeg,032_0_00006.jpeg,032_0_00007.jpeg,032_0_00008.jpeg,032_0_00009.jpeg,no_data.jpg,no_data.jpg,no_data.jpg,no_data.jpg,no_data.jpg,032_1_00001.jpeg,032_1_00002.jpeg,032_1_00003.jpeg,032_1_00004.jpeg,032_1_00005.jpeg,no_data.jpg,no_data.jpg,no_data.jpg,no_data.jpg,no_data.jpg,no_data.jpg,no_data.jpg,no_data.jpg,no_data.jpg,1,0,0,Male,NA,cg.zip
33,CG3388,gooseberry,gsb,FBgn0001148,0,1,0,0,phallus,0,1,0,0,0,phallus,70.9,67.19,0,0,Drosophila melanogaster,yw; +; +,ATCAGGGACCTCCCACAGCA,CCTCCCGGGTGTAGACATCG,ATCAGGGACCTCCCACAGCAtcgacggcatcctcggcggaggcgctggttctgtgggaagcgaggatgagagcgaggacgatgccgagcccagtgtgcagttaaaaaggaaacaaaggcgttcccggacgacattctccaacgaccagatcgacgccctagagcgcatcttcgcccgtacacagtacccCGATGTCTACACCCGGGAGG,395.5,1.96,2.24,2,2018-10-23,145,33,033_28.jpeg,033_48.jpeg,033_0_00001.jpeg,033_0_00002.jpeg,033_0_00003.jpeg,033_0_00004.jpeg,033_0_00005.jpeg,033_0_00006.jpeg,no_data.jpg,no_data.jpg,no_data.jpg,no_data.jpg,no_data.jpg,no_data.jpg,no_data.jpg,no_data.jpg,033_1_00001.jpeg,033_1_00002.jpeg,033_1_00003.jpeg,033_1_00004.jpeg,033_1_00005.jpeg,no_data.jpg,no_data.jpg,no_data.jpg,no_data.jpg,no_data.jpg,no_data.jpg,no_data.jpg,no_data.jpg,no_data.jpg,1,0,0,Male,NA,gsb.zip
34,CG12223,Dorsal switch protein 1,Dsp1,FBgn0011764,1,1,1,1,"hypandrium, phallus, surstylus / epandrial ventral lobe, cercus﻿",1,1,1,1,1,"hypandrium, phallus, surstylus, epandrial ventral lobe, cercus",69.5,66.75,0,0,Drosophila melanogaster,yw; +; +,TGGCTGCTCAGCAACAACAA,CGGCTGCCTGTGCCATATTT,TGGCTGCTCAGCAACAACAAcaagtacaacagcaacagttgcaacaacaccaggtggtcgtccagcagaatcagcagcaggcgcaccagaacagctccaataccacagccggcgtgggcacccaacagctgttcacatacaaaatggccagcagttttccgaatccggccacgacgatggcccaagtggtggccacatcgaacgcagccggcaccacgggctatgattatcgtctAAATATGGCACAGGCAGCCG,380.5,1.94,2.15,2,2018-10-23,122,34,034_28.jpeg,034_48.jpeg,034_0_00001.jpeg,034_0_00002.jpeg,034_0_00003.jpeg,034_0_00004.jpeg,034_0_00005.jpeg,034_0_00006.jpeg,no_data.jpg,no_data.jpg,no_data.jpg,no_data.jpg,no_data.jpg,no_data.jpg,no_data.jpg,no_data.jpg,034_1_00001.jpeg,034_1_00002.jpeg,034_1_00003.jpeg,034_1_00004.jpeg,no_data.jpg,no_data.jpg,no_data.jpg,no_data.jpg,no_data.jpg,no_data.jpg,no_data.jpg,no_data.jpg,no_data.jpg,no_data.jpg,1,0,0,Male,NA,Dsp1.zip
35,CG11922,forkhead domain 96Cb,fd96Cb,FBgn0004898,0,1,0,1,"phallus, cercus﻿",0,1,0,0,1,"phallus, cercus",75.1,66.64,0,0,Drosophila melanogaster,yw; +; +,ATGCCACGCCCATTGAAAAT,CTCGGCACCTTGATGAAGCA,ATGCCACGCCCATTGAAAATgagctacggtgatcagaagcctccctactcgtacatatcattaacggccatggccataatacactcgccgcaaagattgctgccgctcagtgagatatatcgatttataatggatcagtttccattctaccggaagaacacgcaaaagtggcaaaactcactgcggcacaatctcagcttcaacgatTGCTTCATCAAGGTGCCGAG,361.5,1.88,2.05,2,2018-10-23,108,35,035_28.jpeg,035_48.jpeg,035_0_00001.jpeg,035_0_00002.jpeg,035_0_00003.jpeg,035_0_00004.jpeg,no_data.jpg,no_data.jpg,no_data.jpg,no_data.jpg,no_data.jpg,no_data.jpg,no_data.jpg,no_data.jpg,no_data.jpg,no_data.jpg,035_1_00001.jpeg,035_1_00002.jpeg,035_1_00003.jpeg,035_1_00004.jpeg,035_1_00005.jpeg,035_1_00006.jpeg,no_data.jpg,no_data.jpg,no_data.jpg,no_data.jpg,no_data.jpg,no_data.jpg,no_data.jpg,no_data.jpg,1,0,0,Male,NA,fd96Cb.zip
36,CG1133,odd paired,opa,FBgn0003002,0,0,1,0,surstylus / epandrial ventral lobe,0,0,1,0,0,surstylus,57.2,64.85,0,0,Drosophila melanogaster,yw; +; +,CGAGATCGTCACCCACCTGA,CTGTATGCGTCCGCTTGTGG,CGAGATCGTCACCCACCTGAccgtggagcacgtgggcggacccgagtgcaccacccacgcctgcttctgggtgggctgctctcgcaacggacgccctttcaaggccaagtacaagctggtcaaccacatccgcgtccacaccggcgagaaacctttcgcctgcccgcacccgggttgcggcaaggtcttcgcccggagcgagaacctcaagatCCACAAGCGGACGCATACAG,394,1.92,2.33,2,2018-10-23,107,36,036_28.jpeg,036_48.jpeg,036_0_00001.jpeg,036_0_00002.jpeg,036_0_00003.jpeg,036_0_00004.jpeg,036_0_00005.jpeg,no_data.jpg,no_data.jpg,no_data.jpg,no_data.jpg,no_data.jpg,no_data.jpg,no_data.jpg,no_data.jpg,no_data.jpg,036_1_00001.jpeg,036_1_00002.jpeg,036_1_00003.jpeg,036_1_00004.jpeg,036_1_00005.jpeg,no_data.jpg,no_data.jpg,no_data.jpg,no_data.jpg,no_data.jpg,no_data.jpg,no_data.jpg,no_data.jpg,no_data.jpg,1,0,0,Male,NA,opa.zip
37,CG6990,Heterochromatin Protein 1c,HP1c,FBgn0039019,1,1,1,1,"hypandrium, phallus, surstylus / epandrial ventral lobe, cercus﻿",1,1,1,1,1,"hypandrium, phallus, surstylus, epandrial ventral lobe, cercus",72.3,64.73,0,0,Drosophila melanogaster,yw; +; +,CTGGGAGCCCGAGGAGAACT,CTCCACGATCTGTGCCGATG,CTGGGAGCCCGAGGAGAACTgcgattgcccgaatctcatccagaaattcgaggagtcgcgcgccaagtccaagaagcgcggcgagaagaaacccaagtgcgaagagatccagaagctgcgcggctacgagcgcggcttggagctggccgagatcgtgggcgcaacggatgtgacgggcgacatcaagtatctggtgcgctggcagttctgcgacgagttcgacttggtgcCATCGGCACAGATCGTGGAG,391,1.96,2.09,2,2018-10-23,188,37,037_28.jpeg,037_48.jpeg,037_0_00001.jpeg,037_0_00002.jpeg,037_0_00003.jpeg,037_0_00004.jpeg,037_0_00005.jpeg,037_0_00006.jpeg,037_0_00007.jpeg,037_0_00008.jpeg,,no_data.jpg,no_data.jpg,no_data.jpg,no_data.jpg,no_data.jpg,037_1_00001.jpeg,037_1_00002.jpeg,037_1_00003.jpeg,037_1_00004.jpeg,037_1_00005.jpeg,037_1_00006.jpeg,037_1_00007.jpeg,no_data.jpg,no_data.jpg,no_data.jpg,no_data.jpg,no_data.jpg,no_data.jpg,no_data.jpg,1,0,0,Male,NA,HP1c.zip
38,CG5893,Dichaete,D,FBgn0000411,1,1,0,1,"hypandrium, phallus, cercus﻿",1,1,0,0,0,"hypandrium, phallus",48.6,63.89,0,0,Drosophila melanogaster,yw; +; +,GGGTCACATCAAGCGTCCAA,GGCGTGGCCGGTACTTGTAG,GGGTCACATCAAGCGTCCAAtgaacgcgttcatggtctggtcccgcctgcagcgtcgtcagatcgccaaggataaccccaagatgcacaactctgagatctccaagcgcctgggtgccgagtggaagttgctggccgagtcggagaaacgaccattcatcgatgaggccaagcgcttgagggccctgcacatgaaggagcacccggaCTACAAGTACCGGCCACGCC,241.5,1.97,2.01,2,2018-10-23,105,38,038_28.jpeg,038_48.jpeg,038_0_00001.jpeg,038_0_00002.jpeg,038_0_00003.jpeg,038_0_00004.jpeg,no_data.jpg,no_data.jpg,no_data.jpg,no_data.jpg,no_data.jpg,no_data.jpg,no_data.jpg,no_data.jpg,no_data.jpg,no_data.jpg,038_1_00001.jpeg,038_1_00002.jpeg,038_1_00003.jpeg,038_1_00004.jpeg,038_1_00005.jpeg,038_1_00006.jpeg,no_data.jpg,no_data.jpg,no_data.jpg,no_data.jpg,no_data.jpg,no_data.jpg,no_data.jpg,no_data.jpg,1,0,0,Male,NA,D.zip
39,CG4257,Signal-transducer and activator of transcription protein at 92E,Stat92E,FBgn0016917,1,1,1,1,"hypandrium, phallus, surstylus / epandrial ventral lobe, cercus﻿",1,1,1,1,1,"hypandrium, phallus, surstylus, epandrial ventral lobe, cercus",70.6,63.85,0,0,Drosophila melanogaster,yw; +; +,CCAGCCCTCGGTATGGTCAC,TGAGTACGATGGCCGCCTTT,CCAGCCCTCGGTATGGTCACacccaaggtggagctgtacgaggtgcaacatcagatcatgcagtccctcaatgagtttggcaactgtgccaatgccttgaagctgcttgcccaaaactacagttacatgctaaactccacatcctcgccgaacgcagaagctgcctacagaagtcttatcgatgaAAAGGCGGCCATCGTACTCA,318,1.91,1.93,2,2018-10-23,224,39,039_28.jpeg,039_48.jpeg,039_0_00001.jpeg,039_0_00002.jpeg,039_0_00003.jpeg,no_data.jpg,no_data.jpg,no_data.jpg,no_data.jpg,no_data.jpg,no_data.jpg,no_data.jpg,no_data.jpg,no_data.jpg,no_data.jpg,no_data.jpg,039_1_00001.jpeg,039_1_00002.jpeg,039_1_00003.jpeg,039_1_00004.jpeg,039_1_00005.jpeg,039_1_00006.jpeg,039_1_00007.jpeg,039_1_00008.jpeg,no_data.jpg,no_data.jpg,no_data.jpg,no_data.jpg,no_data.jpg,no_data.jpg,1,0,0,Male,NA,Stat92E.zip
40,CG5102,daughterless,da,FBgn0000413,1,1,1,1,"hypandrium, phallus, surstylus / epandrial ventral lobe, cercus﻿",1,1,1,1,1,"hypandrium, phallus, surstylus, epandrial ventral lobe, cercus",62.5,63.06,0,0,Drosophila melanogaster,yw; +; +,CGGTGGAATTGGAGGACCTG,CTGACTGTGGTGGGGGTGTG,CGGTGGAATTGGAGGACCTGgtgccgggcagcaggcaccagtgaacgttaatgtgaatcccccagccgtgttcaattcgccgcaggcccacaaccataaccacacagtacaagcacagcacagtgcactgtccacggctggaccgcttggccatcactcgctcaaccacacgccgcacgcacattcccacacactcccgctcccgcacgccctgccccatggccatacccttcCACACCCCCACCACAGTCAG,254.5,1.96,2.13,2,2018-10-23,225,40,040_28.jpeg,040_48.jpeg,040_0_00001.jpeg,040_0_00002.jpeg,040_0_00003.jpeg,040_0_00004.jpeg,040_0_00005.jpeg,040_0_00006.jpeg,no_data.jpg,no_data.jpg,no_data.jpg,no_data.jpg,no_data.jpg,no_data.jpg,no_data.jpg,no_data.jpg,040_1_00001.jpeg,040_1_00002.jpeg,040_1_00003.jpeg,040_1_00004.jpeg,040_1_00005.jpeg,no_data.jpg,no_data.jpg,no_data.jpg,no_data.jpg,no_data.jpg,no_data.jpg,no_data.jpg,no_data.jpg,no_data.jpg,1,0,0,Male,NA,da.zip
41,CG11094,doublesex,dsx,FBgn0000504,1,1,1,1,"hypandrium, phallus, surstylus / epandrial ventral lobe, cercus﻿",1,1,1,0,1,"hypandrium, phallus, surstylus, cercus",48.8,61.5,0,0,Drosophila melanogaster,yw; +; +,TGCGAGAAGTGCCGACTGAC,CGAGTGGTGTCCTCCGTGTG,TGCGAGAAGTGCCGACTGACggcggaccgccagcgggtgatggctctgcaaacggccttgaggcgagcccaggcgcaggatgagcagcgggcgctgcacatgcacgaggtgccgcctgccaatccggcggccacgaccctcctgagtcatcaccatcatgtcgcagctcccgctcatgtccacgcccaccatgtgcacgcccatcacgCACACGGAGGACACCACTCG,352.3,2.11,2.17,1.6,2018-10-30,108,41,041_28.jpeg,041_48.jpeg,041_0_00001.jpeg,041_0_00002.jpeg,041_0_00003.jpeg,041_0_00004.jpeg,041_0_00005.jpeg,041_0_00006.jpeg,041_0_00007.jpeg,no_data.jpg,no_data.jpg,no_data.jpg,no_data.jpg,no_data.jpg,no_data.jpg,no_data.jpg,041_1_00001.jpeg,041_1_00002.jpeg,041_1_00003.jpeg,041_1_00004.jpeg,041_1_00005.jpeg,041_1_00006.jpeg,041_1_00007.jpeg,041_1_00008.jpeg,no_data.jpg,no_data.jpg,no_data.jpg,no_data.jpg,no_data.jpg,no_data.jpg,1,0,0,Male,NA,dsx.zip
42,CG10159,Boundary element-associated factor of 32kD,BEAF-32,FBgn0015602,1,1,1,1,"hypandrium, phallus, surstylus / epandrial ventral lobe, cercus﻿",1,1,1,1,1,"hypandrium, phallus, surstylus, epandrial ventral lobe, cercus",74.5,59.65,0,0,Drosophila melanogaster,yw; +; +,ACCAGCCGGTGGAAGTAGCA,TGGATCTTGGACCGCACGTA,ACCAGCCGGTGGAAGTAGCAggcccatcggtgttggttcgggcgtacaggctactgtggtggcctccacgtcctccagcagcagctcggccaagcagctgaagaacaacctggagacgtccatcgaacggctgaccgctgtcagcgaacagctcagctacatcatacaacagaatcacgaggagctcaccaaggacgacgactactattttgcacttagcttggtgcccgcaatgcgccacctttcgctcagtcggaagatgTACGTGCGGTCCAAGATCCA,383.2,2.01,2.09,1.6,2018-10-30,193,42,042_28.jpeg,042_48.jpeg,042_0_00001.jpeg,042_0_00002.jpeg,042_0_00003.jpeg,042_0_00004.jpeg,042_0_00005.jpeg,042_0_00006.jpeg,042_0_00007.jpeg,042_0_00008.jpeg,no_data.jpg,no_data.jpg,no_data.jpg,no_data.jpg,no_data.jpg,no_data.jpg,042_1_00001.jpeg,042_1_00002.jpeg,042_1_00003.jpeg,042_1_00004.jpeg,042_1_00005.jpeg,no_data.jpg,no_data.jpg,no_data.jpg,no_data.jpg,no_data.jpg,no_data.jpg,no_data.jpg,no_data.jpg,no_data.jpg,1,0,0,Male,NA,BEAF-32.zip
43,CG17743,pleiohomeotic,pho,FBgn0002521,1,1,1,1,"hypandrium, phallus, surstylus / epandrial ventral lobe, cercus﻿",1,1,1,1,1,"hypandrium, phallus, surstylus, epandrial ventral lobe, cercus",59.4,58.47,0,0,Drosophila melanogaster,yw; +; +,TCGACTGGATGTGGGGAAATG,TCACCGGTGTGAACCAACTGA,TCGACTGGATGTGGGGAAATGaatctttccgaagttacagtatcttatacaaatgataaaaaaatagcttgcccacataagggttgtaataagcacttcagagattcatctgcaatgcgaaaacatttgcacactcacggtcctcgagtccatgtttgtgcagaatgtggaaaagctttcgtagaaagctcaaagcttaaaagacaTCAGTTGGTTCACACCGGTGA,395.55,1.93,2.04,1.6,2018-10-30,NA,43,043_28.jpeg,043_48.jpeg,043_0_00001.jpeg,043_0_00002.jpeg,043_0_00003.jpeg,043_0_00004.jpeg,043_0_00005.jpeg,043_0_00006.jpeg,043_0_00007.jpeg,043_0_00008.jpeg,no_data.jpg,no_data.jpg,no_data.jpg,no_data.jpg,no_data.jpg,no_data.jpg,043_1_00001.jpeg,043_1_00002.jpeg,043_1_00003.jpeg,043_1_00004.jpeg,043_1_00005.jpeg,no_data.jpg,no_data.jpg,no_data.jpg,no_data.jpg,no_data.jpg,no_data.jpg,no_data.jpg,no_data.jpg,no_data.jpg,1,0,0,Male,NA,pho.zip
44,CG2262,Smad on X,Smox,FBgn0025800,1,1,1,1,"hypandrium, phallus, surstylus / epandrial ventral lobe, cercus﻿",1,1,1,1,1,"hypandrium, phallus, surstylus, epandrial ventral lobe, cercus",57,56.93,0,0,Drosophila melanogaster,yw; +; +,TGGCTTTACCGATCCCTCCA,ACCGGGCGGTATCTTGCATA,TGGCTTTACCGATCCCTCCAattcggagcgcttttgcctcggactgctgtctaatgtgaatcgcaacgaggtcgtggagcagacacgtcgccacatcggcaagggcgtacggctttactatattggcggtgaggtattcgcagaatgtctgagcgattcgtccattttcgtacagagcccaaattgtaatcagcgatatggctggcatccggccaccgTATGCAAGATACCGCCCGGT,383.2,1.99,2.1,1.6,2018-10-30,NA,44,044_28.jpeg,044_48.jpeg,044_0_00001.jpeg,044_0_00002.jpeg,044_0_00003.jpeg,044_0_00004.jpeg,044_0_00005.jpeg,044_0_00006.jpeg,044_0_00007.jpeg,044_0_00008.jpeg,no_data.jpg,no_data.jpg,no_data.jpg,no_data.jpg,no_data.jpg,no_data.jpg,044_1_00001.jpeg,044_1_00002.jpeg,044_1_00003.jpeg,044_1_00004.jpeg,044_1_00005.jpeg,044_1_00006.jpeg,044_1_00007.jpeg,no_data.jpg,no_data.jpg,no_data.jpg,no_data.jpg,no_data.jpg,no_data.jpg,no_data.jpg,1,0,0,Male,NA,Smox.zip
45,CG3242,sister of odd and bowl,sob,FBgn0004892,1,1,1,1,"hypandrium, phallus, surstylus / epandrial ventral lobe, cercus﻿",1,1,1,1,1,"hypandrium, phallus, surstylus, epandrial ventral lobe, cercus",49.7,56.75,0,0,Drosophila melanogaster,yw; +; +,AAACGGACTCGGCTCTGCAC,CCGCAGATGTCGCAGGAGTA,AAACGGACTCGGCTCTGCACtcgctgcaggccaccatgtaccaggacaagatgagtgtcatttcgggagcggctggcggcgtaggtgcaggtgcggtaggagggctggaggaggcgggcagctcggcggcggcagcggcagcccagcggtccaagaagcagttcatatgcaaattctgcaaccgacagttcaccaagtcctacaatctgctcatccacgaaagaacgcacacggacgagaggcctTACTCCTGCGACATCTGCGG,362.65,2.06,2.13,1.6,2018-10-30,28,45,045_28.jpeg,045_48.jpeg,045_0_00001.jpeg,045_0_00002.jpeg,045_0_00003.jpeg,045_0_00004.jpeg,045_0_00005.jpeg,045_0_00006.jpeg,045_0_00007.jpeg,no_data.jpg,no_data.jpg,no_data.jpg,no_data.jpg,no_data.jpg,no_data.jpg,no_data.jpg,045_1_00001.jpeg,045_1_00002.jpeg,045_1_00003.jpeg,045_1_00004.jpeg,045_1_00005.jpeg,045_1_00006.jpeg,045_1_00007.jpeg,no_data.jpg,no_data.jpg,no_data.jpg,no_data.jpg,no_data.jpg,no_data.jpg,no_data.jpg,1,0,0,Male,NA,sob.zip
46,CG8376,apterous,ap,FBgn0000099,1,0,1,1,"hypandrium, surstylus / epandrial ventral lobe, cercus﻿",1,1,1,1,1,"hypandrium, phallus, surstylus, epandrial ventral lobe, cercus",53,54.82,0,0,Drosophila melanogaster,yw; +; +,GGGGATACCGCCTCATCCAG,CCTCGATGTCCTTGGGCTTG,GGGGATACCGCCTCATCCAGtatgagcgccacctacccgtacagcgcccagttcggctcaccccacaacgactcctcgagcccgcactcggaccctagtcggagcattgttcctacgggcatctttgtgcccgcgtcccacgtaatcaacggactgccgcagccagctcgtcaaaagggcaggccccgcaagcgCAAGCCCAAGGACATCGAGG,385.2,2.1,2.11,1.6,2018-10-30,153,46,046_28.jpeg,046_48.jpeg,046_0_00001.jpeg,046_0_00002.jpeg,046_0_00003.jpeg,046_0_00004.jpeg,046_0_00005.jpeg,046_0_00006.jpeg,046_0_00007.jpeg,no_data.jpg,no_data.jpg,no_data.jpg,no_data.jpg,no_data.jpg,no_data.jpg,no_data.jpg,046_1_00001.jpeg,046_1_00002.jpeg,046_1_00003.jpeg,046_1_00004.jpeg,046_1_00005.jpeg,no_data.jpg,no_data.jpg,no_data.jpg,no_data.jpg,no_data.jpg,no_data.jpg,no_data.jpg,no_data.jpg,no_data.jpg,1,0,0,Male,NA,ap.zip
47,CG3166,anterior open,aop,FBgn0000097,1,1,1,1,"hypandrium, phallus, surstylus / epandrial ventral lobe, cercus﻿",1,1,1,1,1,"hypandrium, phallus, surstylus, epandrial ventral lobe, cercus",39.8,54.81,0,0,Drosophila melanogaster,yw; +; +,AGTGACGCCCACCAGTCGTT,TGCTGATCCTGGTGCTGCTC,AGTGACGCCCACCAGTCGTTatcccctgtcgccgcacagccatccgccgacgcccacgtggccaccgctgaatgctcctcccgagaacagtcccttccacagttctgctcacagtctggcaggccaccattttatggcgcctaactcggttacgctgagtcctccgccctcggtggattcccaggcgagtagtcctccccaggcaccttaccaaaatggaggagccactgGAGCAGCACCAGGATCAGCA,402.15,2,1.99,1.6,2018-10-30,170,47,047_28.jpeg,047_48.jpeg,047_0_00001.jpeg,047_0_00002.jpeg,047_0_00003.jpeg,047_0_00004.jpeg,047_0_00005.jpeg,047_0_00006.jpeg,047_0_00007.jpeg,047_0_00008.jpeg,047_0_00009.jpeg,047_0_00010.jpeg,047_0_00011.jpeg,047_0_00012.jpeg,047_0_00013.jpeg,047_0_00014.jpeg,047_1_00001.jpeg,047_1_00002.jpeg,047_1_00003.jpeg,047_1_00004.jpeg,047_1_00005.jpeg,047_1_00006.jpeg,047_1_00007.jpeg,no_data.jpg,no_data.jpg,no_data.jpg,no_data.jpg,no_data.jpg,no_data.jpg,no_data.jpg,1,0,0,Male,images 28hr #9-14 and 48 #5-7 were processed independantly and had staining time of 286 min,aop.zip
48,CG1765,Ecdysone receptor,EcR,FBgn0000546,1,1,1,1,"hypandrium, phallus, surstylus / epandrial ventral lobe, cercus﻿",1,1,1,1,1,"hypandrium, phallus, surstylus, epandrial ventral lobe, cercus",69.7,53.46,0,0,Drosophila melanogaster,yw; +; +,GACGCAACTCCAGCCACAGA,CTCCAACTCCGTTGCCCATC,GACGCAACTCCAGCCACAGAttcaaccacagccacagctccttcccgtctccgctcccgtgcccgcctccgtaaccgcacctggttccttgtccgcggtcagtacgagcagcgaatacatgggcggaagtgcggccataggacccatcacgccggcaaccaccagcagtatcacggctgccgttaccgctagctccaccacatcagcggtaccGATGGGCAACGGAGTTGGAG,359.05,2.07,2.08,1.6,2018-10-30,153,48,048_28.jpeg,048_48.jpeg,048_0_00001.jpeg,048_0_00002.jpeg,048_0_00003.jpeg,048_0_00004.jpeg,048_0_00005.jpeg,048_0_00006.jpeg,048_0_00007.jpeg,no_data.jpg,no_data.jpg,no_data.jpg,no_data.jpg,no_data.jpg,no_data.jpg,no_data.jpg,048_1_00001.jpeg,048_1_00002.jpeg,048_1_00003.jpeg,048_1_00004.jpeg,048_1_00005.jpeg,048_1_00006.jpeg,no_data.jpg,no_data.jpg,no_data.jpg,no_data.jpg,no_data.jpg,no_data.jpg,no_data.jpg,no_data.jpg,1,0,0,Male,NA,EcR.zip
49,CG1775,Medea,Med,FBgn0011655,1,1,1,1,"hypandrium, phallus, surstylus / epandrial ventral lobe, cercus﻿",1,1,1,1,1,"hypandrium, phallus, surstylus, epandrial ventral lobe, cercus",49.5,52.95,0,0,Drosophila melanogaster,yw; +; +,TCAGAATCCCCAGGGCAATG,TGCGACACGTAGCCGTTTTG,TCAGAATCCCCAGGGCAATGgggtgcaccatacccaggccaattcgcccacagatcccgcctccgcactggccatgcaacaacagcagcagcagcagcagcagcaacaacaacagcagcagcagcaacagcagcaatcaggcggtgtgcccaatggatcagttaatgccggcggtggagcagcagctggagggcagtactatggacagccacctcctgttagtcagatgcaaggtgccggtgggggtggcacctcggtggccccgtccgtccacgcccagCAAAACGGCTACGTGTCGCA,393.8,2.03,1.99,1.6,2018-10-30,28,49,049_28.jpeg,049_48.jpeg,049_0_00001.jpeg,049_0_00002.jpeg,049_0_00003.jpeg,049_0_00004.jpeg,049_0_00005.jpeg,049_0_00006.jpeg,049_0_00007.jpeg,no_data.jpg,no_data.jpg,no_data.jpg,no_data.jpg,no_data.jpg,no_data.jpg,no_data.jpg,049_1_00001.jpeg,049_1_00002.jpeg,049_1_00003.jpeg,049_1_00004.jpeg,no_data.jpg,no_data.jpg,no_data.jpg,no_data.jpg,no_data.jpg,no_data.jpg,no_data.jpg,no_data.jpg,no_data.jpg,no_data.jpg,1,0,0,Male,NA,Med.zip
50,CG5206,bonus,bon,FBgn0023097,1,1,1,1,"hypandrium, phallus, surstylus / epandrial ventral lobe, cercus﻿",1,1,1,1,1,"hypandrium, phallus, surstylus, epandrial ventral lobe, cercus",53,52.74,0,0,Drosophila melanogaster,yw; +; +,GTCGTGGTGCGTTGACTGCT,GATCCCGATGGTCGCTCAAC,GTCGTGGTGCGTTGACTGCTcggagtatatttgcgacagttgtgtgcaagctcaccagcgcctgaagatcaccaaggatcacacgatcaagcccaaagatgaggccaacaacgagcagctggccggagctgccggggtggacaagttgcacatgtgccagttgcatccgcaggagaagctttcgctattttgcgagacctgcgacaagctcacttgtcgggattgccaGTTGAGCGACCATCGGGATC,362.45,2.02,2.05,1.6,2018-10-30,153,50,050_28.jpeg,050_48.jpeg,050_0_00001.jpeg,050_0_00002.jpeg,050_0_00003.jpeg,050_0_00004.jpeg,050_0_00005.jpeg,050_0_00006.jpeg,050_0_00007.jpeg,no_data.jpg,no_data.jpg,no_data.jpg,no_data.jpg,no_data.jpg,no_data.jpg,no_data.jpg,050_1_00001.jpeg,050_1_00002.jpeg,050_1_00003.jpeg,050_1_00004.jpeg,050_1_00005.jpeg,050_1_00006.jpeg,050_1_00007.jpeg,no_data.jpg,no_data.jpg,no_data.jpg,no_data.jpg,no_data.jpg,no_data.jpg,no_data.jpg,1,0,0,Male,NA,bon.zip
51,CG8544,scalloped,sd,FBgn0003345,1,1,1,1,"hypandrium, phallus, surstylus / epandrial ventral lobe, cercus﻿",1,1,1,1,1,"hypandrium, phallus, surstylus, epandrial ventral lobe, cercus",45.7,51.69,0,0,Drosophila melanogaster,yw; +; +,CGAGAATGTCGTGCTCGTGTG,TTTTCCAGCACACTGTTCATCA,CGAGAATGTCGTGCTCGTGTGctccacaatcgtttgctcctttggcaagcaagtggtggagaaggtggaaagcgagtactctcgactggagaacaatcgctacgtctatcgcattcaacgctcccccatgtgcgagtacatgatcaactttattcagaagctgaagaacctaccggaacgctataTGATGAACAGTGTGCTGGAAAA,268,1.82,2.26,1.6,2018-11-13,293,51,051_28.jpeg,051_48.jpeg,051_0_00001.jpeg,051_0_00002.jpeg,051_0_00003.jpeg,051_0_00004.jpeg,051_0_00005.jpeg,051_0_00006.jpeg,051_0_00007.jpeg,051_0_00008.jpeg,no_data.jpg,no_data.jpg,no_data.jpg,no_data.jpg,no_data.jpg,no_data.jpg,051_1_00001.jpeg,051_1_00002.jpeg,051_1_00003.jpeg,051_1_00004.jpeg,051_1_00005.jpeg,051_1_00006.jpeg,051_1_00007.jpeg,no_data.jpg,no_data.jpg,no_data.jpg,no_data.jpg,no_data.jpg,no_data.jpg,no_data.jpg,1,0,0,Male,NA,sd.zip
52,CG6494,hairy,h,FBgn0001168,1,1,1,1,"hypandrium, phallus, surstylus / epandrial ventral lobe, cercus﻿",1,1,1,1,1,"hypandrium, phallus, surstylus, epandrial ventral lobe, cercus",63.3,51.35,0,0,Drosophila melanogaster,yw; +; +,CGGCCAGCGGTTACTTTCTG,TGCTGACCAACATGGGTTGC,CGGCCAGCGGTTACTTTCTGcccaatggcatgcaggtgatccccaccaagctgcccaacggtagcattgccctcgtgttgccccagagcctgccccagcagcagcagcaacagttgctgcagcaccaacagcagcagcagcaactcgccgtcgcagcagcagcagcggccgcagcagcagcacaacaGCAACCCATGTTGGTCAGCA,270.5,1.89,2.03,1.6,2018-11-13,43,52,052_28.jpeg,052_48.jpeg,052_0_00001.jpeg,052_0_00002.jpeg,052_0_00003.jpeg,052_0_00004.jpeg,052_0_00005.jpeg,052_0_00006.jpeg,052_0_00007.jpeg,052_0_00008.jpeg,no_data.jpg,no_data.jpg,no_data.jpg,no_data.jpg,no_data.jpg,no_data.jpg,052_1_00001.jpeg,052_1_00002.jpeg,052_1_00003.jpeg,052_1_00004.jpeg,052_1_00005.jpeg,052_1_00006.jpeg,no_data.jpg,no_data.jpg,no_data.jpg,no_data.jpg,no_data.jpg,no_data.jpg,no_data.jpg,no_data.jpg,1,0,0,Male,NA,H_.zip
53,CG9088,little imaginal discs,lid,FBgn0031759,1,1,1,1,"hypandrium, phallus, surstylus / epandrial ventral lobe, cercus﻿",1,1,1,1,1,"hypandrium, phallus, surstylus, epandrial ventral lobe, cercus",51.1,50.34,0,0,Drosophila melanogaster,yw; +; +,CCTGCCGATTGGCTGAAGAT,GGAAGCACGTGGTGTTGCAC,CCTGCCGATTGGCTGAAGATggggcgcgagtgtgttaaccactattccatgctgcgacgtttctgtgtcttttcgcacgacgagctcgtttgcaagatggccctggagccagcgaaactcacatttggcatcgctactgcctgctacatcgacatggccgaaatggtcgacacggagaagaaactgcgcaaatcgcttttggagtggggcgttacccgcgcagagcgtcgcgccttcgagctagtaaacgacgatgagcgccattgccaagaGTGCAACACCACGTGCTTCC,252,2,1.94,1.6,2018-11-13,200,53,053_28.jpeg,053_48.jpeg,053_0_00001.jpeg,053_0_00002.jpeg,053_0_00003.jpeg,053_0_00004.jpeg,053_0_00005.jpeg,053_0_00006.jpeg,053_0_00007.jpeg,053_0_00008.jpeg,no_data.jpg,no_data.jpg,no_data.jpg,no_data.jpg,no_data.jpg,no_data.jpg,053_1_00001.jpeg,053_1_00002.jpeg,053_1_00003.jpeg,053_1_00004.jpeg,053_1_00005.jpeg,053_1_00006.jpeg,no_data.jpg,no_data.jpg,no_data.jpg,no_data.jpg,no_data.jpg,no_data.jpg,no_data.jpg,no_data.jpg,1,0,0,Male,NA,lid.zip
54,CG4491,no ocelli,noc,FBgn0005771,1,0,1,1,"hypandrium, surstylus / epandrial ventral lobe, cercus﻿",0,1,1,1,1,"phallus, surstylus, epandrial ventral lobe, cercus",52.4,50.27,0,0,Drosophila melanogaster,yw; +; +,CGCACAGACTTGCTCCCAAA,TGGTGGCTCAGCACATTGGT,CGCACAGACTTGCTCCCAAAttggagcggattcgtcggcagtgaaacccctgctggcaatggacaagaacaagacaaagcccggagcatgctcctcgtcgtcgaactcgtcgagttcctcgggcagtgctgagatctcggcagccaagtcaccctccggccaggccaaatcgcccaagtcgagcactccaatcagctcgacggcaaccagcgcaagtctgagtaataccagcaccggtgaaatcaaactggccttcaagccctacgagACCAATGTGCTGAGCCACCA,282,1.96,1.98,1.6,2018-11-13,157,54,054_28.jpeg,054_48.jpeg,054_0_00001.jpeg,054_0_00002.jpeg,054_0_00003.jpeg,054_0_00004.jpeg,054_0_00005.jpeg,054_0_00006.jpeg,054_0_00007.jpeg,054_0_00008.jpeg,no_data.jpg,no_data.jpg,no_data.jpg,no_data.jpg,no_data.jpg,no_data.jpg,054_1_00001.jpeg,054_1_00002.jpeg,054_1_00003.jpeg,054_1_00004.jpeg,054_1_00005.jpeg,054_1_00006.jpeg,054_1_00007.jpeg,054_1_00008.jpeg,no_data.jpg,no_data.jpg,no_data.jpg,no_data.jpg,no_data.jpg,no_data.jpg,1,0,0,Male,NA,noc.zip
55,CG8727,cycle,cyc,FBgn0023094,1,1,1,1,"hypandrium, phallus, surstylus / epandrial ventral lobe, cercus﻿",1,1,1,1,1,"hypandrium, phallus, surstylus, epandrial ventral lobe, cercus",42.8,49.49,0,0,Drosophila melanogaster,yw; +; +,GATGCAGCGAAAGCTGGACA,CCAGCTCTGTCCCAGCAGGT,GATGCAGCGAAAGCTGGACAaactgactgtgctccggatggcagtgcagcatctgcgagggatccgtggcagcggcagcttacatccattcaacggatccgattaccggcctagcttcctgtccgaccaggagctcaagatgattatcctgcaagcgtcggagggattcctgttcgtggtgggttgtgaccgaggacgcatcctgtacgtttccgattcggtgtccagtgtgctgaacagcacccaagcggACCTGCTGGGACAGAGCTGG,260.5,1.93,2.06,1.6,2018-11-13,293,55,055_28.jpeg,055_48.jpeg,055_0_00001.jpeg,055_0_00002.jpeg,055_0_00003.jpeg,055_0_00004.jpeg,055_0_00005.jpeg,055_0_00006.jpeg,055_0_00007.jpeg,055_0_00008.jpeg,055_0_00009.jpeg,no_data.jpg,no_data.jpg,no_data.jpg,no_data.jpg,no_data.jpg,055_1_00001.jpeg,055_1_00002.jpeg,055_1_00003.jpeg,055_1_00004.jpeg,055_1_00005.jpeg,055_1_00006.jpeg,no_data.jpg,no_data.jpg,no_data.jpg,no_data.jpg,no_data.jpg,no_data.jpg,no_data.jpg,no_data.jpg,1,0,0,Male,NA,cyc.zip
56,CG8573,suppressor of Hairy wing,su(Hw),FBgn0003567,1,1,1,1,"hypandrium, phallus, surstylus / epandrial ventral lobe, cercus﻿",1,1,1,1,1,"hypandrium, phallus, surstylus, epandrial ventral lobe, cercus",51.7,47.35,0,0,Drosophila melanogaster,yw; +; +,GAAATACGGCTGGCCCAATG,TCCAATCCACCTTCGTCCTGA,GAAATACGGCTGGCCCAATGcccccgaggagacggtgctctgcaaagtgatcgagaactgtggccacgacctaaccaaaggtggcgaaaactacgctgagcttgactacggtagccgcatgcgagagtactgcaaactgctctttaccgtggtcattcacaacgattccatcaagtcgctgctcaataatttccccatcgacgatgtgatcgaatatgtactgggagatgaggaTCAGGACGAAGGTGGATTGGA,303.5,1.92,2.07,1.6,2018-11-13,200,56,056_28.jpeg,056_48.jpeg,056_0_00001.jpeg,056_0_00002.jpeg,056_0_00003.jpeg,056_0_00004.jpeg,056_0_00005.jpeg,056_0_00006.jpeg,no_data.jpg,no_data.jpg,no_data.jpg,no_data.jpg,no_data.jpg,no_data.jpg,no_data.jpg,no_data.jpg,056_1_00001.jpeg,056_1_00002.jpeg,056_1_00003.jpeg,056_1_00004.jpeg,056_1_00005.jpeg,056_1_00006.jpeg,056_1_00007.jpeg,056_1_00008.jpeg,056_1_00009.jpeg,no_data.jpg,no_data.jpg,no_data.jpg,no_data.jpg,no_data.jpg,1,0,0,Male,NA,su_Hw_.zip
57,CG2275,Jun-related antigen,Jra,FBgn0001291,1,1,1,1,"hypandrium, phallus, surstylus / epandrial ventral lobe, cercus﻿",1,1,1,1,1,"hypandrium, phallus, surstylus, epandrial ventral lobe, cercus",40.9,47.31,0,0,Drosophila melanogaster,yw; +; +,TGGAGCGCATCTCAAAGCTG,CTCCAGTGCCACGTCCTCCT,TGGAGCGCATCTCAAAGCTGgaggatcgcgtgaaggtacttaagggcgagaacgtcgacctggctagcatcgtgaagaacctcaaggaccatgtggcgcagctgaagcagcaggtgatggagcacattgccgcgggctgcacggtgccgccgaactcgacagaccaataacatttggagttgtcagccggggagaatgatgAGGAGGACGTGGCACTGGAG,289.5,1.98,2.07,1.6,2018-11-13,200,57,057_28.jpeg,057_48.jpeg,057_0_00001.jpeg,057_0_00002.jpeg,057_0_00003.jpeg,057_0_00004.jpeg,057_0_00005.jpeg,057_0_00006.jpeg,no_data.jpg,no_data.jpg,no_data.jpg,no_data.jpg,no_data.jpg,no_data.jpg,no_data.jpg,no_data.jpg,057_1_00001.jpeg,057_1_00002.jpeg,057_1_00003.jpeg,057_1_00004.jpeg,057_1_00005.jpeg,057_1_00006.jpeg,057_1_00007.jpeg,no_data.jpg,no_data.jpg,no_data.jpg,no_data.jpg,no_data.jpg,no_data.jpg,no_data.jpg,1,0,0,Male,NA,Jra.zip
58,CG42311,grainy head,grh,FBgn0259211,1,1,1,1,"hypandrium, phallus, surstylus / epandrial ventral lobe, cercus﻿",1,1,1,1,1,"hypandrium, phallus, surstylus, epandrial ventral lobe, cercus",39.9,46.69,0,0,Drosophila melanogaster,yw; +; +,AATGCACCGATCACCGGACT,CGTCTGCTGTTGCTGCTGCT,AATGCACCGATCACCGGACTcaccgcagccagaattggccaccatgacgaacgtcaacgtgctggatctgcacacggataactccaagctgtacgacaaggaggctgtatttatatacgaaacgcccaaggtggtgatgccagcggatggcgggggtggcaataattccgatgaaggtcatgccatcgatgcgcggattgcggcccaaatgggcaaccaagcccagcaacagcAGCAGCAGCAACAGCAGACG,261,1.92,2.01,1.6,2018-11-13,110,58,058_28.jpeg,058_48.jpeg,058_0_00001.jpeg,058_0_00002.jpeg,058_0_00003.jpeg,058_0_00004.jpeg,058_0_00005.jpeg,058_0_00006.jpeg,058_0_00007.jpeg,058_0_00008.jpeg,058_0_00009.jpeg,058_0_00010.jpeg,no_data.jpg,no_data.jpg,no_data.jpg,no_data.jpg,058_1_00001.jpeg,058_1_00002.jpeg,058_1_00003.jpeg,058_1_00004.jpeg,058_1_00005.jpeg,058_1_00006.jpeg,no_data.jpg,no_data.jpg,no_data.jpg,no_data.jpg,no_data.jpg,no_data.jpg,no_data.jpg,no_data.jpg,1,0,0,Male,NA,grh.zip
59,CG12399,Mothers against dpp,Mad,FBgn0011648,1,1,1,1,"hypandrium, phallus, surstylus / epandrial ventral lobe, cercus﻿",0,1,0,0,1,"phallus, cercus",44.9,46.56,0,0,Drosophila melanogaster,yw; +; +,CTGCAGTCGCACCACGAACT,GACTGCCCACCGATGTGTTG,CTGCAGTCGCACCACGAACTgaagccactcgagctgtgccagtatccgttcagcgccaagcagaaggaggtgtgcatcaatccgtatcactataagcgcgtggagagtccggtgctcccgccagtactcgttcctcgccactcggaattcgcgcccggtcactcgatgctgcagttcaaccatgtggccgagcccagtatgccgcacaatgtgagctactcgaacagtggattcaactcgcacagcttgagcaccagCAACACATCGGTGGGCAGTC,267.5,1.98,2.06,1.6,2018-11-13,157,59,059_28.jpeg,059_48.jpeg,059_0_00001.jpeg,059_0_00002.jpeg,059_0_00003.jpeg,059_0_00004.jpeg,059_0_00005.jpeg,059_0_00006.jpeg,059_0_00007.jpeg,no_data.jpg,no_data.jpg,no_data.jpg,no_data.jpg,no_data.jpg,no_data.jpg,no_data.jpg,059_1_00001.jpeg,059_1_00002.jpeg,059_1_00003.jpeg,059_1_00004.jpeg,059_1_00005.jpeg,059_1_00006.jpeg,059_1_00007.jpeg,059_1_00008.jpeg,no_data.jpg,no_data.jpg,no_data.jpg,no_data.jpg,no_data.jpg,no_data.jpg,1,0,0,Male,NA,Mad.zip
60,CG7803,zeste,z,FBgn0004050,1,1,1,1,"hypandrium, phallus, surstylus / epandrial ventral lobe, cercus﻿",1,1,1,1,1,"hypandrium, phallus, surstylus, epandrial ventral lobe, cercus",47,45.64,0,0,Drosophila melanogaster,yw; +; +,CCTGTGGCCACTGCATCATC,TTCATCCTGCGCCTTGTTGA,CCTGTGGCCACTGCATCATCgggatctgcgaactcagtggcggtcaacacatcaacagcctcctccgtgagtatcaacaacaccagcctgggcggaggagggggtaatggagccactaatgcgtctgctaccgctgcggacagcttcgaagagcgaatgaactacttcaaaatccgcgaggctgaactgcgctgcaaggagcagcagctggccacagaagccaagcgcattgaacTCAACAAGGCGCAGGATGAA,293.5,1.88,2.13,1.6,2018-11-13,236,60,060_28.jpeg,060_48.jpeg,060_0_00001.jpeg,060_0_00002.jpeg,060_0_00003.jpeg,060_0_00004.jpeg,060_0_00005.jpeg,060_0_00006.jpeg,060_0_00007.jpeg,060_0_00008.jpeg,060_0_00009.jpeg,no_data.jpg,no_data.jpg,no_data.jpg,no_data.jpg,no_data.jpg,060_1_00001.jpeg,060_1_00002.jpeg,060_1_00003.jpeg,060_1_00004.jpeg,060_1_00005.jpeg,no_data.jpg,no_data.jpg,no_data.jpg,no_data.jpg,no_data.jpg,no_data.jpg,no_data.jpg,no_data.jpg,no_data.jpg,1,0,0,Male,NA,z.zip
61,CG5748,Heat shock factor,Hsf,FBgn0001222,1,0,1,1,"hypandrium, surstylus / epandrial ventral lobe, cercus﻿",1,0,1,1,1,"hypandrium, surstylus, epandrial ventral lobe, cercus",45.6,45.55,0,0,Drosophila melanogaster,yw; +; +,atccatcaccggctggctac,cggactgtttggcacctcct,ATCCATCACCGGCTGGCTACaccgcagcctcacattatgaccaagagagcgtctctccgcctgccgttgagcgtccgcgatctaacatgagcattagctcgcacaacgtcgattattcgaatcagagtgtggaggacttgctgctccagggaaatggaaccgctggcggtaatattctagtaggcggagccgcttctcccatggcccaaagtgtgagtcaatcgccggcccaacatgatgtctacacagtcaccgaggcgcccgattctcatgtccAGGAGGTGCCAAACAGTCCG,192.45,1.94,2.08,3.2,2018-12-04,193,61,061_28.jpeg,061_48.jpeg,061_0_00001.jpeg,061_0_00002.jpeg,061_0_00003.jpeg,061_0_00004.jpeg,061_0_00005.jpeg,no_data.jpg,no_data.jpg,no_data.jpg,no_data.jpg,no_data.jpg,no_data.jpg,no_data.jpg,no_data.jpg,no_data.jpg,061_1_00001.jpeg,061_1_00002.jpeg,061_1_00003.jpeg,061_1_00004.jpeg,no_data.jpg,no_data.jpg,no_data.jpg,no_data.jpg,no_data.jpg,no_data.jpg,no_data.jpg,no_data.jpg,no_data.jpg,no_data.jpg,1,0,0,Male,NA,Hsf.zip
62,CG8068,Suppressor of variegation 2-10,Su(var)2-10,FBgn0003612,1,1,1,1,"hypandrium, phallus, surstylus / epandrial ventral lobe, cercus﻿",1,1,1,1,1,"hypandrium, phallus, surstylus, epandrial ventral lobe, cercus",49.4,44.62,0,0,Drosophila melanogaster,yw; +; +,tcctccacacacacagcatcaa,gtcgcacgaagtctccacca,TCCTCCACACACACAGCATCAAcagccagctgcctattcaccccgatgtgcggctgaaaaagctagccttctacgatgtactcggaacgctaattaagccttcaactctggtgccacgcaacactcagcgcgtccaagaggtgcctttctacttcacgctcacgccgcagcaggccaccgagattgcctctaatcgcgacattcgcaacagctccaaggtggagcacgccattcaggttcaactgcgcttttgccTGGTGGAGACTTCGTGCGAC,192.8,1.92,2.03,1.6,2018-12-17,295,62,062_28.jpeg,062_48.jpeg,062_0_00001.jpeg,062_0_00002.jpeg,062_0_00003.jpeg,062_0_00004.jpeg,062_0_00005.jpeg,062_0_00006.jpeg,062_0_00007.jpeg,062_0_00008.jpeg,062_0_00009.jpeg,no_data.jpg,no_data.jpg,no_data.jpg,no_data.jpg,no_data.jpg,062_1_00001.jpeg,062_1_00002.jpeg,062_1_00003.jpeg,062_1_00004.jpeg,062_1_00005.jpeg,062_1_00006.jpeg,no_data.jpg,no_data.jpg,no_data.jpg,no_data.jpg,no_data.jpg,no_data.jpg,no_data.jpg,no_data.jpg,1,0,0,Male,NA,Su_var_2-10.zip
63,CG6677,"absent, small, or homeotic discs 2",ash2,FBgn0000139,0,0,1,0,surstylus / epandrial ventral lobe,1,0,0,0,0,hypandrium,48.3,44.52,0,0,Drosophila melanogaster,yw; +; +,ccggggatgctggtactttg,tcgccctccacataggcatc,CCGGGGATGCTGGTACTTTGaggtcaccatcgaagagatgcccgacggagctgccacgcgacttggctggggccgggagtacggcaacttgcaggctccattgggatacgacaagttcggttactcctggagatctcgcaagggcaccaagtttaccgagagccatggcaaacactacagtGATGCCTATGTGGAGGGCGA,213,1.94,2.21,3.2,2018-12-04,214,63,063_28.jpeg,063_48.jpeg,063_0_00001.jpeg,063_0_00002.jpeg,063_0_00003.jpeg,063_0_00004.jpeg,063_0_00005.jpeg,063_0_00006.jpeg,063_0_00007.jpeg,063_0_00008.jpeg,no_data.jpg,no_data.jpg,no_data.jpg,no_data.jpg,no_data.jpg,no_data.jpg,063_1_00001.jpeg,063_1_00002.jpeg,063_1_00003.jpeg,063_1_00004.jpeg,no_data.jpg,no_data.jpg,no_data.jpg,no_data.jpg,no_data.jpg,no_data.jpg,no_data.jpg,no_data.jpg,no_data.jpg,no_data.jpg,1,0,0,Male,NA,ash2.zip
64,CG5580,scribbler,sbb,FBgn0010575,1,0,1,1,"hypandrium, surstylus / epandrial ventral lobe, cercus﻿",1,0,1,1,1,"hypandrium, surstylus, epandrial ventral lobe, cercus",42.4,43.88,0,0,Drosophila melanogaster,yw; +; +,caaatctccgcctgccaaaa,tcccaagccacaccaactca,CAAATCTCCGCCTGCCAAAAgggtcaagcatgaggctggcgctagtggagcaggaggcggcaaggagatggtggacatctgcattggcacctcggtgggcaccatcaccgaaccggactgcctgggtccctgcgaacctggcacttccgtaaccctcgaagggattgtgtggcacgagaccgaaggcggcgttctcgtggtcaatgtcacgtggcggggcaagacctacgtgggcactctgctagactgcacccgacacgattgggctcctccaaggTGAGTTGGTGTGGCTTGGGA,145.8,1.93,2.15,3.2,2018-12-04,195,64,064_28.jpeg,064_48.jpeg,064_0_00001.jpeg,064_0_00002.jpeg,064_0_00003.jpeg,064_0_00004.jpeg,064_0_00005.jpeg,064_0_00006.jpeg,no_data.jpg,no_data.jpg,no_data.jpg,no_data.jpg,no_data.jpg,no_data.jpg,no_data.jpg,no_data.jpg,064_1_00001.jpeg,064_1_00002.jpeg,064_1_00003.jpeg,064_1_00004.jpeg,064_1_00005.jpeg,064_1_00006.jpeg,064_1_00007.jpeg,no_data.jpg,no_data.jpg,no_data.jpg,no_data.jpg,no_data.jpg,no_data.jpg,no_data.jpg,1,0,0,Male,NA,sbb.zip
65,CG8127,Ecdysone-induced protein 75B,Eip75B,FBgn0000568,1,0,1,1,"hypandrium, surstylus / epandrial ventral lobe, cercus﻿",1,1,1,1,1,"hypandrium, phallus, surstylus, epandrial ventral lobe, cercus",22.4,43.39,0,0,Drosophila melanogaster,yw; +; +,cgggcaacgagaagaacgag,ttcagatggctgctggtgga,CGGGCAACGAGAAGAACGAGtgcaaggcggtgagttcggggggaagttcctcgtgctccagtccgcgttccagtgtggatgatgcgctggactgcagcgatgccgccgccaatcacaatcaggtggtgcagcatccgcagctgagtgtggtgtccgtgtcaccagttcgctcgccccagcccTCCACCAGCAGCCATCTGAA,124.5,1.86,2.14,3.2,2018-12-04,175,65,065_28.jpeg,065_48.jpeg,065_0_00001.jpeg,065_0_00002.jpeg,065_0_00003.jpeg,065_0_00004.jpeg,065_0_00005.jpeg,065_0_00006.jpeg,065_0_00007.jpeg,no_data.jpg,no_data.jpg,no_data.jpg,no_data.jpg,no_data.jpg,no_data.jpg,no_data.jpg,065_1_00001.jpeg,065_1_00002.jpeg,065_1_00003.jpeg,065_1_00004.jpeg,065_1_00005.jpeg,065_1_00006.jpeg,065_1_00007.jpeg,no_data.jpg,no_data.jpg,no_data.jpg,no_data.jpg,no_data.jpg,no_data.jpg,no_data.jpg,1,0,0,Male,NA,Eip75B.zip
66,CG8208,Methyl-CpG binding domain protein-like,MBD-like,FBgn0027950,1,0,1,1,"hypandrium, surstylus / epandrial ventral lobe, cercus﻿",1,1,1,1,1,"hypandrium, phallus, surstylus, epandrial ventral lobe, cercus",45.5,43.03,0,0,Drosophila melanogaster,yw; +; +,gggagaagcgactggaacga,cgacccgatcctcctgtttg,GGGAGAAGCGACTGGAACGActacgcgcctgccacgacagtggcgaggagctagacgacatctcactgcccaagaccatacgcaccgttggccccaatgtcaacgaacagaccgtcctccagtcggtggccacggccctgcatatgctcaacgccggcgtacacggccagagttctacgaaggctgatttgaccaagaatgccatggcgtttatgaatcctgaacaaccgctaatgcacgcggtgatcatttcggaggacgacatacgCAAACAGGAGGATCGGGTCG,213.05,1.96,2.08,1.6,2018-12-04,235,66,066_28.jpeg,066_48.jpeg,066_0_00001.jpeg,066_0_00002.jpeg,066_0_00003.jpeg,066_0_00004.jpeg,066_0_00005.jpeg,066_0_00006.jpeg,066_0_00007.jpeg,no_data.jpg,no_data.jpg,no_data.jpg,no_data.jpg,no_data.jpg,no_data.jpg,no_data.jpg,066_1_00001.jpeg,066_1_00002.jpeg,066_1_00003.jpeg,066_1_00004.jpeg,066_1_00005.jpeg,066_1_00006.jpeg,066_1_00007.jpeg,066_1_00008.jpeg,066_1_00009.jpeg,no_data.jpg,no_data.jpg,no_data.jpg,no_data.jpg,no_data.jpg,1,0,0,Male,NA,MBD-like.zip
67,CG3851,odd skipped,odd,FBgn0002985,1,1,1,1,"hypandrium, phallus, surstylus / epandrial ventral lobe, cercus﻿",1,1,1,1,1,"hypandrium, phallus, surstylus, epandrial ventral lobe, cercus",33.5,42.12,0,0,Drosophila melanogaster,yw; +; +,atcccgctggcctccatagt,cctctcgtccgtgtgggttc,ATCCCGCTGGCCTCCATAGTctgcatgccgcggtcatgggtcgccacttcggagccatgcccaccctgaaactgggtggtgccggtggagcgagtggtgtacccagcggcgcaactggcagcagtcggccaaagaagcagttcatctgcaagtactgcaaccggcagttcaccaagtcgtacaatctgctcatccatgagaGAACCCACACGGACGAGAGG,117.5,1.86,1.88,3.2,2018-12-04,237,67,067_28.jpeg,067_48.jpeg,067_0_00001.jpeg,067_0_00002.jpeg,067_0_00003.jpeg,067_0_00004.jpeg,067_0_00005.jpeg,067_0_00006.jpeg,067_0_00007.jpeg,no_data.jpg,no_data.jpg,no_data.jpg,no_data.jpg,no_data.jpg,no_data.jpg,no_data.jpg,067_1_00001.jpeg,067_1_00002.jpeg,067_1_00003.jpeg,067_1_00004.jpeg,067_1_00005.jpeg,067_1_00006.jpeg,no_data.jpg,no_data.jpg,no_data.jpg,no_data.jpg,no_data.jpg,no_data.jpg,no_data.jpg,no_data.jpg,1,0,0,Male,NA,odd.zip
68,CG4654,DP transcription factor,Dp,FBgn0011763,1,1,1,1,"hypandrium, phallus, surstylus / epandrial ventral lobe, cercus﻿",1,1,1,1,1,"hypandrium, phallus, surstylus, epandrial ventral lobe, cercus",58.4,42.04,0,0,Drosophila melanogaster,yw; +; +,tccatgtcggcctcctcatc,tttgcgggcagtcctatcca,TCCATGTCGGCCTCCTCATCgtccgttcaaaggaaacgcaagccggacaaggcaggcaaaggtttgcgccatttctcgatgaaggtatgcgaaaaggtggaggagaagggcaagaccacctacaatgaggtggccgacgacctggtcagcgaggagatgaagaacaatgcgtacgacaacaactgtgatcaaaagaatatccgacgtcgtgtctacgatgcgctcaacgtactgatggcaatcaatgttatttccaaggacaagaaggagattcgcTGGATAGGACTGCCCGCAAA,124.55,1.81,1.97,3.2,2018-12-04,216,68,068_28.jpeg,068_48.jpeg,068_0_00001.jpeg,068_0_00002.jpeg,068_0_00003.jpeg,068_0_00004.jpeg,068_0_00005.jpeg,068_0_00006.jpeg,no_data.jpg,no_data.jpg,no_data.jpg,no_data.jpg,no_data.jpg,no_data.jpg,no_data.jpg,no_data.jpg,068_1_00001.jpeg,068_1_00002.jpeg,068_1_00003.jpeg,068_1_00004.jpeg,068_1_00005.jpeg,068_1_00006.jpeg,068_1_00007.jpeg,no_data.jpg,no_data.jpg,no_data.jpg,no_data.jpg,no_data.jpg,no_data.jpg,no_data.jpg,1,0,0,Male,NA,Dp.zip
69,CG8676,Hormone receptor-like in 39,Hr39,FBgn0261239,1,0,1,1,"hypandrium, surstylus / epandrial ventral lobe, cercus﻿",1,0,1,1,1,"hypandrium, surstylus, epandrial ventral lobe, cercus",33,41.05,0,0,Drosophila melanogaster,yw; +; +,cccgactccgccatacattc,actcaggttctgcgcctcct,CCCGACTCCGCCATACATTCcgtctacacgcacagctccccctcgcagtcgcctctgacgtcgcgccacgccccctacactccgtctctgagccgcaacaacagcgacgcctcgcacagtagctgctacagctatagctccgaattcagtcccacacactcgcccattcaagcgcgtcatgccccacccgccggcacgctctatggcaaccaccatggtatttaccgccagatgaaggtggaagcctcatccactgtgccgtccagtgggcAGGAGGCGCAGAACCTGAGT,130.85,1.93,1.93,3.2,2018-12-04,217,69,069_28.jpeg,069_48.jpeg,069_0_00001.jpeg,069_0_00002.jpeg,069_0_00003.jpeg,069_0_00004.jpeg,069_0_00005.jpeg,069_0_00006.jpeg,069_0_00007.jpeg,069_0_00008.jpeg,no_data.jpg,no_data.jpg,no_data.jpg,no_data.jpg,no_data.jpg,no_data.jpg,069_1_00001.jpeg,069_1_00002.jpeg,069_1_00003.jpeg,no_data.jpg,no_data.jpg,no_data.jpg,no_data.jpg,no_data.jpg,no_data.jpg,no_data.jpg,no_data.jpg,no_data.jpg,no_data.jpg,no_data.jpg,1,0,0,Male,NA,Hr39.zip
70,CG9102,bric a brac 2,bab2,FBgn0025525,1,1,1,1,"hypandrium, phallus, surstylus / epandrial ventral lobe, cercus﻿",1,1,1,1,1,"hypandrium, phallus, surstylus, epandrial ventral lobe, cercus",36.1,40.48,0,0,Drosophila melanogaster,yw; +; +,atggtgctatccgcctgctc,ggccagttcctcctcctcgt,ATGGTGCTATCCGCCTGCTCaccctacttccaggccctgttctacgacaatccctgccagcaccccatcatcatcatgcgggacgtcagctggtccgacctgaaggccctggtggagttcatgtacaagggggagatcaacgtctgccaggatcagataaaccccctgctcaaagtggccgaaaccctgaagatcaggggtctggcggaggtcagtgcgggcaggggcgagggaggcgcctccgcacttcccatgtccgccttcgacgatgaggACGAGGAGGAGGAACTGGCC,111.85,2.05,1.73,3.2,2018-12-04,137,70,070_28.jpeg,070_48.jpeg,070_0_00001.jpeg,070_0_00002.jpeg,070_0_00003.jpeg,070_0_00004.jpeg,070_0_00005.jpeg,070_0_00006.jpeg,070_0_00007.jpeg,070_0_00008.jpeg,no_data.jpg,no_data.jpg,no_data.jpg,no_data.jpg,no_data.jpg,no_data.jpg,070_1_00001.jpeg,070_1_00002.jpeg,070_1_00003.jpeg,070_1_00004.jpeg,070_1_00005.jpeg,070_1_00006.jpeg,070_1_00007.jpeg,no_data.jpg,no_data.jpg,no_data.jpg,no_data.jpg,no_data.jpg,no_data.jpg,no_data.jpg,1,0,0,Male,NA,bab2.zip
71,CG33261,Trithorax-like,Trl,FBgn0013263,1,1,1,1,"hypandrium, phallus, surstylus / epandrial ventral lobe, cercus﻿",1,0,1,1,1,"hypandrium, surstylus, epandrial ventral lobe, cercus",50.9,40.45,0,0,Drosophila melanogaster,yw; +; +,gaggcgctgctggagtttgt,ctgcgttggtctgggtcgtt,GAGGCGCTGCTGGAGTTTGTgtaccgcggagaggtgagcgtggatcacgcccagctgccgtcgctactgcaggctgcccagtgcctgaacatccagggactggcaccgcagacggttaccaaggacgactacaccacgcactcgatacaactgcagcacatgattccacaacatcacgaccaagaccaactgattgccacgatcgccacggctccacagcaaacggttcatgcccaggtggtggaggacatccatcatcagggccagattctccaggcAACGACCCAGACCAACGCAG,141.1,1.96,1.91,3.2,2018-12-04,198,71,071_28.jpeg,071_48.jpeg,071_0_00001.jpeg,071_0_00002.jpeg,071_0_00003.jpeg,071_0_00004.jpeg,071_0_00005.jpeg,071_0_00006.jpeg,no_data.jpg,no_data.jpg,no_data.jpg,no_data.jpg,no_data.jpg,no_data.jpg,no_data.jpg,no_data.jpg,071_1_00001.jpeg,071_1_00002.jpeg,071_1_00003.jpeg,071_1_00004.jpeg,071_1_00005.jpeg,no_data.jpg,no_data.jpg,no_data.jpg,no_data.jpg,no_data.jpg,no_data.jpg,no_data.jpg,no_data.jpg,no_data.jpg,1,0,0,Male,NA,Trl.zip
72,CG12052,longitudinals lacking,lola,FBgn0005630,1,0,1,1,"hypandrium, surstylus / epandrial ventral lobe, cercus﻿",1,1,1,0,1,"hypandrium, phallus, surstylus, cercus",42.7,40.44,0,0,Drosophila melanogaster,yw; +; +,ggtttggccgtctccgcttt,caccttggctctgggcttgt,GGTTTGGCCGTCTCCGCTTTggtcaccacccagttgtccagcggaccggcagccggaaccagcagccaagcgtcgtcgacccaacaacagcagccattgaccagcaccaacgttaccaaaaagactgaaagcgctaaactaacatcctcgacagccgccccagcgagcggagcatctgcgtcagcggctgtacaacaggcccatctgcatcagcagcaggcgcagaccacaagcgatgccattaacaccgagaatgtACAAGCCCAGAGCCAAGGTG,139.85,1.88,1.87,3.2,2018-12-11,75,72,072_28.jpeg,072_48.jpeg,072_0_00001.jpeg,072_0_00002.jpeg,072_0_00003.jpeg,072_0_00004.jpeg,072_0_00005.jpeg,072_0_00006.jpeg,072_0_00007.jpeg,072_0_00008.jpeg,no_data.jpg,no_data.jpg,no_data.jpg,no_data.jpg,no_data.jpg,no_data.jpg,072_1_00001.jpeg,072_1_00002.jpeg,072_1_00003.jpeg,072_1_00004.jpeg,072_1_00005.jpeg,072_1_00006.jpeg,072_1_00007.jpeg,no_data.jpg,no_data.jpg,no_data.jpg,no_data.jpg,no_data.jpg,no_data.jpg,no_data.jpg,1,0,0,Male,NA,lola.zip
73,CG4217,mitochondrial transcription factor A,TFAM,FBgn0038805,0,0,1,1,"surstylus / epandrial ventral lobe, cercus﻿",1,1,1,1,1,"hypandrium, phallus, surstylus, epandrial ventral lobe, cercus",48,39.94,0,0,Drosophila melanogaster,yw; +; +,gatgccacactcacggagga,acttggcggtggtcttttgg,GATGCCACACTCACGGAGGAgcagcgggccgagatcaagcagctcaagcaggacctcgttgacgccaaggagcgccgccagctgcgcaagcgggtcaaggagctggggcgacccaaaaagcccgcttcggccttcctgcgattcatcgccagcgaacgtatcaacactccgcagggcgacaagcaaacctaccgcgagtggcaCCAAAAGACCACCGCCAAGT,154,1.93,2.03,3.2,2018-12-17,303,73,073_28.jpeg,073_48.jpeg,073_0_00001.jpeg,073_0_00002.jpeg,073_0_00003.jpeg,073_0_00004.jpeg,073_0_00005.jpeg,073_0_00006.jpeg,073_0_00007.jpeg,073_0_00008.jpeg,no_data.jpg,no_data.jpg,no_data.jpg,no_data.jpg,no_data.jpg,no_data.jpg,073_1_00001.jpeg,073_1_00002.jpeg,073_1_00003.jpeg,073_1_00004.jpeg,no_data.jpg,no_data.jpg,no_data.jpg,no_data.jpg,no_data.jpg,no_data.jpg,no_data.jpg,no_data.jpg,no_data.jpg,no_data.jpg,1,0,0,Male,NA,TFAM.zip
74,CG4029,jumeau,jumu,FBgn0015396,1,0,1,1,"hypandrium, surstylus / epandrial ventral lobe, cercus﻿",1,1,1,1,1,"hypandrium, phallus, surstylus, epandrial ventral lobe, cercus",48.3,39.82,0,0,Drosophila melanogaster,yw; +; +,agctgggcaagggaaaagga,ttgatgatgcggcgagtttg,AGCTGGGCAAGGGAAAAGGAtcaacactgctaaatgccagtgttggggcgaccaacaccattaaactggcgcccggtatcggtgggttaacctttgccaacagtgcagcctaccagaagctgaagcaaacatccttggttaagtcaccaggcggtatttcgccaggagcaggatccaatatgggtctcaagcgggaggactcaaacaagcgaggactgcaggccagcaccacgccaaagagcattgcttcggcggCAAACTCGCCGCATCATCAA,146.55,1.93,2,3.2,2018-12-07,219,74,074_28.jpeg,074_48.jpeg,074_0_00001.jpeg,074_0_00002.jpeg,074_0_00003.jpeg,074_0_00004.jpeg,074_0_00005.jpeg,074_0_00006.jpeg,074_0_00007.jpeg,074_0_00008.jpeg,074_0_00009.jpeg,no_data.jpg,no_data.jpg,no_data.jpg,no_data.jpg,no_data.jpg,074_1_00001.jpeg,074_1_00002.jpeg,074_1_00003.jpeg,074_1_00004.jpeg,074_1_00005.jpeg,no_data.jpg,no_data.jpg,no_data.jpg,no_data.jpg,no_data.jpg,no_data.jpg,no_data.jpg,no_data.jpg,no_data.jpg,1,0,0,Male,NA,jumu.zip
75,CG18023,Ecdysone-induced protein 78C,Eip78C,FBgn0004865,1,0,1,1,"hypandrium, surstylus / epandrial ventral lobe, cercus﻿",1,1,1,1,1,"hypandrium, phallus, surstylus, epandrial ventral lobe, cercus",9.2,38.45,0,0,Drosophila melanogaster,yw; +; +,cacgctgagcaatggtggag,cgctgacgaggaggaggatg,CACGCTGAGCAATGGTGGAGgtgctttgtacaccatcagcagtgtgcatcagttcggtccggccagcaaccacaacaccagcagcagctccccctcctccagcgccgcccactcttcgccggacagcggctgctcgtcggcctcctcctccggatcttcgcgatcctgcggatcctcctctgCATCCTCCTCCTCGTCAGCG,144.65,1.92,2.03,3.2,2018-12-07,237,75,075_28.jpeg,075_48.jpeg,075_0_00001.jpeg,075_0_00002.jpeg,075_0_00003.jpeg,075_0_00004.jpeg,075_0_00005.jpeg,075_0_00006.jpeg,075_0_00007.jpeg,075_0_00008.jpeg,no_data.jpg,no_data.jpg,no_data.jpg,no_data.jpg,no_data.jpg,no_data.jpg,075_1_00001.jpeg,075_1_00002.jpeg,075_1_00003.jpeg,075_1_00004.jpeg,075_1_00005.jpeg,no_data.jpg,no_data.jpg,no_data.jpg,no_data.jpg,no_data.jpg,no_data.jpg,no_data.jpg,no_data.jpg,no_data.jpg,1,0,0,Male,NA,Eip78C.zip
76,CG2988,empty spiracles,ems,FBgn0000576,1,0,1,1,"hypandrium, surstylus / epandrial ventral lobe, cercus﻿",0,1,1,1,1,"phallus, surstylus, epandrial ventral lobe, cercus",32.7,38.41,0,0,Drosophila melanogaster,yw; +; +,acccaagagccaccaggaca,gatcagcagagtgggcgaaga,ACCCAAGAGCCACCAGGACAttcaggagctgctgcagaggctgcaccacaatgccgccatggccagcggcctgagtccgctgcagacacgcctctcccccgaaacggagcagccccagatggccgtctccctcaagcgggaacgctcacctgcaccacctgccatggagcaggccgagaatcccgcccagcgcatccagccaccgcacacgcctcccaaatccgtgagcccccagtcctcgcagccctcgTCTTCGCCCACTCTGCTGATC,127.15,1.96,1.87,3.2,2018-12-07,186,76,076_28.jpeg,076_48.jpeg,076_0_00001.jpeg,076_0_00002.jpeg,076_0_00003.jpeg,076_0_00004.jpeg,no_data.jpg,no_data.jpg,no_data.jpg,no_data.jpg,no_data.jpg,no_data.jpg,no_data.jpg,no_data.jpg,no_data.jpg,no_data.jpg,076_1_00001.jpeg,076_1_00002.jpeg,076_1_00003.jpeg,076_1_00004.jpeg,076_1_00005.jpeg,076_1_00006.jpeg,076_1_00007.jpeg,076_1_00008.jpeg,076_1_00009.jpeg,076_1_00010.jpeg,no_data.jpg,no_data.jpg,no_data.jpg,no_data.jpg,1,0,0,Male,NA,ems.zip
77,CG1071,E2F transcription factor 2,E2f2,FBgn0024371,1,0,1,1,"hypandrium, surstylus / epandrial ventral lobe, cercus﻿",1,1,1,1,1,"hypandrium, phallus, surstylus, epandrial ventral lobe, cercus",47.3,38.15,0,0,Drosophila melanogaster,yw; +; +,caagcgcaaaaccgcgagta,tggccttcacgagatccaca,CAAGCGCAAAACCGCGAGTAttgttaaaagagacagctccgcagcgggcaccacctcctcggctatgatgatgaaggtggattcggctgagacttcggtccggtcgcagagctacgagtctacacccgttagcatggacacatcaccggatcctccaacgccaatcaagtctccgtcgaattcacaatcgcaatcgcagcctggacaacagcgctccgtgggctcactggtcctgctcacacagaagttTGTGGATCTCGTGAAGGCCA,124.4,1.93,1.78,3.2,2018-12-07,219,77,077_28.jpeg,077_48.jpeg,077_0_00001.jpeg,077_0_00002.jpeg,077_0_00003.jpeg,077_0_00004.jpeg,077_0_00005.jpeg,077_0_00006.jpeg,077_0_00007.jpeg,no_data.jpg,no_data.jpg,no_data.jpg,no_data.jpg,no_data.jpg,no_data.jpg,no_data.jpg,077_1_00001.jpeg,077_1_00002.jpeg,077_1_00003.jpeg,077_1_00004.jpeg,077_1_00005.jpeg,no_data.jpg,no_data.jpg,no_data.jpg,no_data.jpg,no_data.jpg,no_data.jpg,no_data.jpg,no_data.jpg,no_data.jpg,1,0,0,Male,NA,E2f2.zip
78,CG4677,lame duck,lmd,FBgn0039039,1,0,1,1,"hypandrium, surstylus / epandrial ventral lobe, cercus﻿",1,1,1,1,1,"hypandrium, phallus, surstylus, epandrial ventral lobe, cercus",39.3,37.56,0,0,Drosophila melanogaster,yw; +; +,ggacctgcaacactggcaac,gatgcggctggcgtacct,GGACCTGCAACACTGGCAACcgcaacagcaacaacaacggcaacagcaacatatggcaatggcaacatggcgcccgcaccggaaacggaagtgctgagcgtttgcagcggtggcggcagcagtaacagtaacagcaacaataaccgttacaatgcgaatattaatcaattaagcgaactcgagcaattgctgacgacggcgaagcccacAGGTACGCCAGCCGCATC,129.55,1.98,1.83,3.2,2018-12-11,80,78,078_28.jpeg,078_48.jpeg,078_0_00001.jpeg,078_0_00002.jpeg,078_0_00003.jpeg,078_0_00004.jpeg,078_0_00005.jpeg,078_0_00006.jpeg,no_data.jpg,no_data.jpg,no_data.jpg,no_data.jpg,no_data.jpg,no_data.jpg,no_data.jpg,no_data.jpg,078_1_00001.jpeg,078_1_00002.jpeg,078_1_00003.jpeg,078_1_00004.jpeg,078_1_00005.jpeg,078_1_00006.jpeg,078_1_00007.jpeg,no_data.jpg,no_data.jpg,no_data.jpg,no_data.jpg,no_data.jpg,no_data.jpg,no_data.jpg,1,0,0,Male,NA,lmd.zip
79,CG9930,E5,E5,FBgn0008646,1,0,1,1,"hypandrium, surstylus / epandrial ventral lobe, cercus﻿",0,1,0,1,1,"phallus, epandrial ventral lobe, cercus",32.6,37.49,0,0,Drosophila melanogaster,yw; +; +,cgccaacgaacacgaacaac,agaggcaacggacggatgag,CGCCAACGAACACGAACAACagtgggcgccggacgcccaggggctatatctactgccgcagaagggattcgctggatcgatcgcgcagtcctcagagatcaccggttagccggtcgccatcgccccccaatgcaggaggcaatccggcagcggccgggaatactgcaaagtccggggatccatcgtcgggaacgggaaatcctccaaccCTCATCCGTCCGTTGCCTCT,104.95,2.02,1.76,3.2,2018-12-07,153,79,079_28.jpeg,079_48.jpeg,079_0_00001.jpeg,079_0_00002.jpeg,079_0_00003.jpeg,079_0_00004.jpeg,079_0_00005.jpeg,079_0_00006.jpeg,079_0_00007.jpeg,no_data.jpg,no_data.jpg,no_data.jpg,no_data.jpg,no_data.jpg,no_data.jpg,no_data.jpg,079_1_00001.jpeg,079_1_00002.jpeg,079_1_00003.jpeg,079_1_00004.jpeg,079_1_00005.jpeg,079_1_00006.jpeg,079_1_00007.jpeg,no_data.jpg,no_data.jpg,no_data.jpg,no_data.jpg,no_data.jpg,no_data.jpg,no_data.jpg,1,0,0,Male,NA,E5.zip
80,CG4380,ultraspiracle,usp,FBgn0003964,0,0,1,1,"surstylus / epandrial ventral lobe, cercus﻿",0,0,0,0,0,no expression,39.5,36.86,0,0,Drosophila melanogaster,yw; +; +,gccacatcaaggaggaggtca,ccccgcaaatagagcagag,CCACATCAAGGAGGAGGTCAagccggacatctcgcagctgaacgacagcaacaacagcagcttttcgcccaaggccgagagtcccgtgcccttcatgcaggccatgtccatggtccacgtgctgcccggctccaactccgccagctccaacaacaacagcgctggagatgcccaaatggcgcaggcgcccaattcggctggaggctctgccgccgctgcagtccagcagcagtatccgcctaaccatccgctgagcggcagcaagcacCTCTGCTCTATTTGCGGGG,358.5,1.9,2.34,1.6,2018-12-17,307,80,080_28.jpeg,080_48.jpeg,080_0_00001.jpeg,080_0_00002.jpeg,080_0_00003.jpeg,080_0_00004.jpeg,080_0_00005.jpeg,080_0_00006.jpeg,080_0_00007.jpeg,no_data.jpg,no_data.jpg,no_data.jpg,no_data.jpg,no_data.jpg,no_data.jpg,no_data.jpg,080_1_00001.jpeg,080_1_00002.jpeg,080_1_00003.jpeg,080_1_00004.jpeg,080_1_00005.jpeg,080_1_00006.jpeg,no_data.jpg,no_data.jpg,no_data.jpg,no_data.jpg,no_data.jpg,no_data.jpg,no_data.jpg,no_data.jpg,1,0,0,Male,NA,usp.zip
81,CG3445,pleiohomeotic like,phol,FBgn0035997,0,0,1,1,"surstylus / epandrial ventral lobe, cercus﻿",1,1,1,1,1,"hypandrium, phallus, surstylus, epandrial ventral lobe, cercus",37.5,35.64,0,0,Drosophila melanogaster,yw; +; +,cggaggatgaggacgaggag,cgctgaatggatcgggtagg,CGGAGGATGAGGACGAGGAGgaggagttggaggaaccacctggttgtgctggcaccacatccgtgacgtcctcctccgccgcccagaatgaaggatcacccagcatgccaaagcttattattgacgagcacatgatcaaccacgatgttttaagcgatggcatcggcaacgagtacgtcatCCTACCCGATCCATTCAGCG,177.55,1.91,1.97,3.2,2018-12-17,310,81,081_28.jpeg,081_48.jpeg,081_0_00001.jpeg,081_0_00002.jpeg,081_0_00003.jpeg,081_0_00004.jpeg,081_0_00005.jpeg,081_0_00006.jpeg,081_0_00007.jpeg,081_0_00008.jpeg,no_data.jpg,no_data.jpg,no_data.jpg,no_data.jpg,no_data.jpg,no_data.jpg,081_1_00001.jpeg,081_1_00002.jpeg,081_1_00003.jpeg,081_1_00004.jpeg,081_1_00005.jpeg,081_1_00006.jpeg,081_1_00007.jpeg,no_data.jpg,no_data.jpg,no_data.jpg,no_data.jpg,no_data.jpg,no_data.jpg,no_data.jpg,1,0,0,Male,NA,phol.zip
82,CG32346,Enhancer of bithorax,E(bx),FBgn0000541,0,0,1,1,"surstylus / epandrial ventral lobe, cercus﻿",1,0,1,1,1,"hypandrium, surstylus, epandrial ventral lobe, cercus",37.6,34.99,0,0,Drosophila melanogaster,yw; +; +,ctttgccgctcgcataaggt,tttggcgctcgatttcgtct,CTTTGCCGCTCGCATAAGGTaagtggcgtagtggactgcgtgttgccacaagaaaaacaaggcgtgctaatccggcatgatagcctcggtgttgatcgtcatgggcgcaaatattggtttattgcacgtcgcatttttatcgaggatcaggagaactttacatgctggtattacagtacgacaagtaagttaaaattgctgctcagtcgactggacgccgaagaactggaaactcgtctgcatagccagattacagaaaggagAGACGAAATCGAGCGCCAAA,396.5,1.87,2.21,1.6,2018-12-17,272,82,082_28.jpeg,082_48.jpeg,082_0_00001.jpeg,082_0_00002.jpeg,082_0_00003.jpeg,082_0_00004.jpeg,082_0_00005.jpeg,082_0_00006.jpeg,no_data.jpg,no_data.jpg,no_data.jpg,no_data.jpg,no_data.jpg,no_data.jpg,no_data.jpg,no_data.jpg,082_1_00001.jpeg,082_1_00002.jpeg,082_1_00003.jpeg,082_1_00004.jpeg,082_1_00005.jpeg,082_1_00006.jpeg,082_1_00007.jpeg,no_data.jpg,no_data.jpg,no_data.jpg,no_data.jpg,no_data.jpg,no_data.jpg,no_data.jpg,1,0,0,Male,NA,E_bx_.zip
83,CG5838,DNA replication-related element factor,Dref,FBgn0015664,0,0,1,1,"surstylus / epandrial ventral lobe, cercus﻿",1,0,1,1,1,"hypandrium, surstylus, epandrial ventral lobe, cercus",53.4,34.78,0,0,Drosophila melanogaster,yw; +; +,tatcccatccaccgctgtcc,ggcgctcctcctcctctacc,TATCCCATCCACCGCTGTCCaagcggaatgtttcctcgcggcgggtcaaactggagttcattaataaccggaaccacgataacgcttccgatgatgaactggacgaagcagccgtggcaactgcggccatgcaggcggaggaggacgcctcctcgcaaaccatgctgtacgagaccatggtgcccttcacctacgacgaggccgaaaatctGGTAGAGGAGGAGGAGCGCC,195.45,2,1.94,3.2,2018-12-17,247,83,083_28.jpeg,083_48.jpeg,083_0_00001.jpeg,083_0_00002.jpeg,083_0_00003.jpeg,083_0_00004.jpeg,083_0_00005.jpeg,083_0_00006.jpeg,083_0_00007.jpeg,083_0_00008.jpeg,no_data.jpg,no_data.jpg,no_data.jpg,no_data.jpg,no_data.jpg,no_data.jpg,083_1_00001.jpeg,083_1_00002.jpeg,083_1_00003.jpeg,083_1_00004.jpeg,083_1_00005.jpeg,083_1_00006.jpeg,no_data.jpg,no_data.jpg,no_data.jpg,no_data.jpg,no_data.jpg,no_data.jpg,no_data.jpg,no_data.jpg,1,0,0,Male,NA,Dref.zip
84,CG10619,tailup,tup,FBgn0003896,1,0,1,1,"hypandrium, surstylus / epandrial ventral lobe, cercus﻿",1,1,1,1,1,"hypandrium, phallus, surstylus, epandrial ventral lobe, cercus",32.8,33.98,0,0,Drosophila melanogaster,yw; +; +,gctacgacctgaacgggatg,ggtgacgtaggagtcggtgct,GCTACGACCTGAACGGGATGcccattctgccgccgcatccgcactcgcatccggcgcaaggacctccccaccagcaccccccgccccccggcggaccgcacaaccatcagaaccagcagccgaaccagcagcccggaggcagcagtttggactccgggatcacctcgcaccaccatccggacAGCACCGACTCCTACGTCACC,363.5,1.92,2.13,1.6,2018-12-17,197,84,084_28.jpeg,084_48.jpeg,084_0_00001.jpeg,084_0_00002.jpeg,084_0_00003.jpeg,084_0_00004.jpeg,084_0_00005.jpeg,084_0_00006.jpeg,084_0_00007.jpeg,084_0_00008.jpeg,084_0_00009.jpeg,no_data.jpg,no_data.jpg,no_data.jpg,no_data.jpg,no_data.jpg,084_1_00001.jpeg,084_1_00002.jpeg,084_1_00003.jpeg,084_1_00004.jpeg,084_1_00005.jpeg,084_1_00006.jpeg,084_1_00007.jpeg,no_data.jpg,no_data.jpg,no_data.jpg,no_data.jpg,no_data.jpg,no_data.jpg,no_data.jpg,1,0,0,Male,NA,tup.zip
85,CG8567,Deformed epidermal autoregulatory factor-1,Deaf1,FBgn0013799,1,0,1,1,"hypandrium, surstylus / epandrial ventral lobe, cercus﻿",0,0,0,0,0,no expression,33.1,33.71,0,0,Drosophila melanogaster,yw; +; +,cggtggcggtgtggtttc,tggttgcgtctgctgttgct,CGGTGGCGGTGTGGTTTCggtgcccgtatccctgcccatcggttcgatgataaccggcactaccttcaatgtgatcacgcccgaccagctgccccctcacttcaagccgatgctgtgcgtcgacaacaatggctacctgtccggcagcacggtcagcatgggcaacgacctcaagacgatcgtcatccAGCAACAGCAGACGCAACCA,226,1.97,2.31,1.6,2018-12-17,316,85,085_28.jpeg,085_48.jpeg,085_0_00001.jpeg,085_0_00002.jpeg,085_0_00003.jpeg,085_0_00004.jpeg,085_0_00005.jpeg,085_0_00006.jpeg,no_data.jpg,no_data.jpg,no_data.jpg,no_data.jpg,no_data.jpg,no_data.jpg,no_data.jpg,no_data.jpg,085_1_00001.jpeg,085_1_00002.jpeg,085_1_00003.jpeg,085_1_00004.jpeg,no_data.jpg,no_data.jpg,no_data.jpg,no_data.jpg,no_data.jpg,no_data.jpg,no_data.jpg,no_data.jpg,no_data.jpg,no_data.jpg,1,0,0,Male,NA,Deaf1.zip
86,CG32139,Sox21b,Sox21b,FBgn0042630,1,0,1,1,"hypandrium, surstylus / epandrial ventral lobe, cercus﻿",1,1,0,0,0,"hypandrium, phallus",20.1,31.56,0,0,Drosophila melanogaster,yw; +; +,accagtcgccacagcatcag,cgaggtcgaggaggaggaaa,ACCAGTCGCCACAGCATCAGcagcagcatcagcaccacccgtgcagtagcaacagcagcaacggatcccccaacggctccaccggcctgggcctgcatccccactcggcgctccacctggcacaccatcactcgcagctgcatcagcaccacccggcgggtcagcagcagcagcacagccaaccgccggTTTCCTCCTCCTCGACCTCG,380.5,1.93,2.3,1.6,2018-12-17,237,86,086_28.jpeg,086_48.jpeg,086_0_00001.jpeg,086_0_00002.jpeg,086_0_00003.jpeg,086_0_00004.jpeg,086_0_00005.jpeg,086_0_00006.jpeg,086_0_00007.jpeg,086_0_00008.jpeg,086_0_00009.jpeg,no_data.jpg,no_data.jpg,no_data.jpg,no_data.jpg,no_data.jpg,086_1_00001.jpeg,086_1_00002.jpeg,086_1_00003.jpeg,086_1_00004.jpeg,086_1_00005.jpeg,086_1_00006.jpeg,no_data.jpg,no_data.jpg,no_data.jpg,no_data.jpg,no_data.jpg,no_data.jpg,no_data.jpg,no_data.jpg,1,0,0,Male,NA,Sox21b.zip
87,CG3827,scute,sc,FBgn0004170,1,0,1,1,"hypandrium, surstylus / epandrial ventral lobe, cercus﻿",1,0,1,1,1,"hypandrium, surstylus, epandrial ventral lobe, cercus",27.7,31.41,0,0,Drosophila melanogaster,yw; +; +,gagtgtgctgtccaccaacga,tatatggagccggcgaggaa,GAGTGTGCTGTCCACCAACGAaacgtttccaacgaccatcaattcggcaacgaagatctttcgttatcagcacataatgccagcccctagtccattaattcccggtggcaatcaaaatcaacccgctggcacaatgccaattaagactcgcaagtatacaccaaggggtatggcactgaccagatgctctgaatcagtatcatctctatcgcctggTTCCTCGCCGGCTCCATATA,238.5,1.9,2.09,1.6,2018-12-17,240,87,087_28.jpeg,087_48.jpeg,087_0_00001.jpeg,087_0_00002.jpeg,087_0_00003.jpeg,087_0_00004.jpeg,087_0_00005.jpeg,087_0_00006.jpeg,087_0_00007.jpeg,no_data.jpg,no_data.jpg,no_data.jpg,no_data.jpg,no_data.jpg,no_data.jpg,no_data.jpg,087_1_00001.jpeg,087_1_00002.jpeg,087_1_00003.jpeg,087_1_00004.jpeg,087_1_00005.jpeg,087_1_00006.jpeg,087_1_00007.jpeg,no_data.jpg,no_data.jpg,no_data.jpg,no_data.jpg,no_data.jpg,no_data.jpg,no_data.jpg,1,0,0,Male,NA,sc.zip
88,CG4717,knirps,kni,FBgn0001320,1,1,1,1,"hypandrium, phallus, surstylus / epandrial ventral lobe, cercus﻿",1,1,1,1,1,"hypandrium, phallus, surstylus, epandrial ventral lobe, cercus",20.3,31.22,0,0,Drosophila melanogaster,yw; +; +,tgtctgcctggaggaggatg,ccgctgtcgttgaagctgtg,TGTCTGCCTGGAGGAGGATGttcactccgtgcacagccatcagtcgtccgcaagcctcctgcatcccattgccatccgagccacgccaaccactccgactagcagcagcccgctgagttttgcggccaagatgcagagcttgtcgcccgtttcggtttgctccattggcggcgaaaccaccagcgttgtaccagtgcatcctcccaccgtttccgctcaagaaggacccatggatctgagcatgaagacctcgcggagctccgtgCACAGCTTCAACGACAGCGG,208.5,1.91,2.02,3.2,2018-12-17,240,88,088_28.jpeg,088_48.jpeg,088_0_00001.jpeg,088_0_00002.jpeg,088_0_00003.jpeg,088_0_00004.jpeg,088_0_00005.jpeg,088_0_00006.jpeg,088_0_00007.jpeg,no_data.jpg,no_data.jpg,no_data.jpg,no_data.jpg,no_data.jpg,no_data.jpg,no_data.jpg,088_1_00001.jpeg,088_1_00002.jpeg,088_1_00003.jpeg,088_1_00004.jpeg,088_1_00005.jpeg,088_1_00006.jpeg,no_data.jpg,no_data.jpg,no_data.jpg,no_data.jpg,no_data.jpg,no_data.jpg,no_data.jpg,no_data.jpg,1,0,0,Male,NA,kni.zip
89,CG8346,"Enhancer of split m3, helix-loop-helix",HLHm3,FBgn0002609,0,0,1,1,"surstylus / epandrial ventral lobe, cercus﻿",1,0,1,1,1,"hypandrium, surstylus, epandrial ventral lobe, cercus",41.2,30.77,0,0,Drosophila melanogaster,yw; +; +,ggcgagccaggatcaacaag,cacatagccggagcgaaagg,GGCGAGCCAGGATCAACAAGtgtctggacgatctcaaggatctgatggtggagtgcctgcagcaggagggcgagcacgtcacccggctggagaaggcggatatcctggagttgaccgtggatcacatgaggaaactcaagcagcggggtggtctttcgctgcagggagtagtggctggtgttggcagcccacccacctcaaccagtaccgcccacgtggagtCCTTTCGCTCCGGCTATGTG,280,1.94,2.13,1.6,2018-12-17,206,89,089_28.jpeg,089_48.jpeg,089_0_00001.jpeg,089_0_00002.jpeg,089_0_00003.jpeg,089_0_00004.jpeg,089_0_00005.jpeg,089_0_00006.jpeg,089_0_00007.jpeg,089_0_00008.jpeg,089_0_00009.jpeg,no_data.jpg,no_data.jpg,no_data.jpg,no_data.jpg,no_data.jpg,089_1_00001.jpeg,089_1_00002.jpeg,089_1_00003.jpeg,089_1_00004.jpeg,089_1_00005.jpeg,089_1_00006.jpeg,no_data.jpg,no_data.jpg,no_data.jpg,no_data.jpg,no_data.jpg,no_data.jpg,no_data.jpg,no_data.jpg,1,0,0,Male,NA,HLHm3.zip
90,CG9653,brinker,brk,FBgn0024250,1,0,1,1,"hypandrium, surstylus / epandrial ventral lobe, cercus﻿",1,0,1,1,1,"hypandrium, surstylus, epandrial ventral lobe, cercus",27.3,30.58,0,0,Drosophila melanogaster,yw; +; +,gatgtggaggtggacgtggag,tgaggcgacgctgtttcttg,GATGTGGAGGTGGACGTGGAGacggagcagccggaggagcacaagctgccctctaaacaggtcaagctatttaagccctatttgctggacgatgatgaggagcaggatcatcatcatcatcaccatcaccatcggcaggaggatttggatgagggagctgccgaggaggagcaggacgacgaggaagagtcccgctatgccgacgatgatgaggtggactccaaggaggcggccgaCAAGAAACAGCGTCGCCTCA,212.45,1.97,1.94,3.2,2018-12-17,206,90,090_28.jpeg,090_48.jpeg,090_0_00001.jpeg,090_0_00002.jpeg,090_0_00003.jpeg,090_0_00004.jpeg,090_0_00005.jpeg,090_0_00006.jpeg,090_0_00007.jpeg,090_0_00008.jpeg,no_data.jpg,no_data.jpg,no_data.jpg,no_data.jpg,no_data.jpg,no_data.jpg,090_1_00001.jpeg,090_1_00002.jpeg,090_1_00003.jpeg,090_1_00004.jpeg,090_1_00005.jpeg,090_1_00006.jpeg,090_1_00007.jpeg,090_1_00008.jpeg,no_data.jpg,no_data.jpg,no_data.jpg,no_data.jpg,no_data.jpg,no_data.jpg,1,0,0,Male,NA,brk.zip
91,CG17835,invected,inv,FBgn0001269,0,1,1,1,"phallus, surstylus / epandrial ventral lobe, cercus﻿",0,1,1,0,1,"phallus, surstylus, cercus",27.2,30.3,0,0,Drosophila melanogaster,yw; +; +,agcagacggagtgcgaggag,gggcggcaaaacagtggtag,AGCAGACGGAGTGCGAGGAGcagctgaacatagaggatgaagaggtcgaggaggagcacgatttggacctggaggatccggccagctgctgcagtgagaatagtgtcttgagtgtgggccaggaacaatcggaagcagcacaggctgcgctatccgctcaagctcaggccaggcagaggcttttgatcagccaaatctatcgaccgtcggcattcagcagcactgCTACCACTGTTTTGCCGCCC,241,2.03,1.91,2,2019-01-15,127,91,091_28.jpeg,091_48.jpeg,091_0_00001.jpeg,091_0_00002.jpeg,091_0_00003.jpeg,091_0_00004.jpeg,091_0_00005.jpeg,091_0_00006.jpeg,091_0_00007.jpeg,091_0_00008.jpeg,no_data.jpg,no_data.jpg,no_data.jpg,no_data.jpg,no_data.jpg,no_data.jpg,091_1_00001.jpeg,091_1_00002.jpeg,091_1_00003.jpeg,091_1_00004.jpeg,091_1_00005.jpeg,091_1_00006.jpeg,091_1_00007.jpeg,091_1_00008.jpeg,no_data.jpg,no_data.jpg,no_data.jpg,no_data.jpg,no_data.jpg,no_data.jpg,1,0,0,Male,NA,inv.zip
92,CG7937,C15,C15,FBgn0004863,0,0,1,1,"surstylus / epandrial ventral lobe, cercus﻿",0,0,1,1,1,"surstylus, epandrial ventral lobe, cercus",28.6,30.27,0,0,Drosophila melanogaster,yw; +; +,cgaaaagggcgaggagaagg,cgtgatgcagtggcggtagt,CGAAAAGGGCGAGGAGAAGGagctactgcagcaggaggaccacgacctggcctataagctggccaccagcatcgccaactcgacatacggaagcgccgcagcactatactcgtatccgcatctctatccctcagcggccggcggtcatgtgctacgtgtaccgccccagagaacgccgctcacctgggcACTACCGCCACTGCATCACG,177,1.98,1.94,2,2019-01-15,127,92,092_28.jpeg,092_48.jpeg,092_0_00001.jpeg,092_0_00002.jpeg,092_0_00003.jpeg,092_0_00004.jpeg,092_0_00005.jpeg,092_0_00006.jpeg,092_0_00007.jpeg,092_0_00008.jpeg,no_data.jpg,no_data.jpg,no_data.jpg,no_data.jpg,no_data.jpg,no_data.jpg,092_1_00001.jpeg,092_1_00002.jpeg,092_1_00003.jpeg,092_1_00004.jpeg,092_1_00005.jpeg,092_1_00006.jpeg,092_1_00007.jpeg,092_1_00008.jpeg,no_data.jpg,no_data.jpg,no_data.jpg,no_data.jpg,no_data.jpg,no_data.jpg,1,0,0,Male,NA,C15.zip
93,CG1071,E2F transcription factor 2,E2f,FBgn0011766,1,0,1,1,"hypandrium, surstylus / epandrial ventral lobe, cercus﻿",1,1,1,1,1,"hypandrium, phallus, surstylus, epandrial ventral lobe, cercus",34.3,30.19,0,0,Drosophila melanogaster,yw; +; +,gcctggtgacgaaccaaggaa,ggccgtcagctcgttctcca,GCCTGGTGACGAACCAAGGAAagagtactacaaatccgcacgatgtggatgggttctttgactatcaccgtctggacacgccctcaccctcgacgtcgtcgcactccagcgaggatggtaacgctccagcatgcgcggggaacgtgatcaccgacgagcacggttactcgtgcaatcccgggatgaaagatgagatgaaactttTGGAGAACGAGCTGACGGCC,262,1.99,2.03,2,2019-01-15,222,93,093_28.jpeg,093_48.jpeg,093_0_00001.jpeg,093_0_00002.jpeg,093_0_00003.jpeg,093_0_00004.jpeg,093_0_00005.jpeg,093_0_00006.jpeg,093_0_00007.jpeg,no_data.jpg,no_data.jpg,no_data.jpg,no_data.jpg,no_data.jpg,no_data.jpg,no_data.jpg,093_1_00001.jpeg,093_1_00002.jpeg,093_1_00003.jpeg,093_1_00004.jpeg,093_1_00005.jpeg,093_1_00006.jpeg,093_1_00007.jpeg,093_1_00008.jpeg,no_data.jpg,no_data.jpg,no_data.jpg,no_data.jpg,no_data.jpg,no_data.jpg,1,0,0,Male,NA,E2f.zip
94,CG5460,Hairless,H,FBgn0001169,1,1,1,1,"hypandrium, phallus, surstylus / epandrial ventral lobe, cercus﻿",1,1,1,1,1,"hypandrium, phallus, surstylus, epandrial ventral lobe, cercus",30.4,30.16,0,0,Drosophila melanogaster,yw; +; +,gcgcgagttcgaaaaggtgt,agctaccgctgccactgctc,GCGCGAGTTCGAAAAGGTGTcgctagaggacaacggatgcgtaaacaacggcagcggtggagctagtagcggtggtgctggaggaaaacggagtcgagcaaagggaacttcgacatcgtctccggctggcaaggcgtcaccaatgaacttggcgccaccccaaggaaagccaagccccagtcccggctccagctcatccagcacttcgccagcgaccttgtcaacgcagccaacgcggctcaacagctcttacagtatccactccctgctaggtggGAGCAGTGGCAGCGGTAGCT,225,2.02,2.07,2,2019-01-15,172,94,094_28.jpeg,094_48.jpeg,094_0_00001.jpeg,094_0_00002.jpeg,094_0_00003.jpeg,094_0_00004.jpeg,094_0_00005.jpeg,094_0_00006.jpeg,094_0_00007.jpeg,no_data.jpg,no_data.jpg,no_data.jpg,no_data.jpg,no_data.jpg,no_data.jpg,no_data.jpg,094_1_00001.jpeg,094_1_00002.jpeg,094_1_00003.jpeg,094_1_00004.jpeg,094_1_00005.jpeg,094_1_00006.jpeg,no_data.jpg,no_data.jpg,no_data.jpg,no_data.jpg,no_data.jpg,no_data.jpg,no_data.jpg,no_data.jpg,1,0,0,Male,NA,h.zip
95,CG8599,Suppressor of variegation 3-7,Su(var)3-7,FBgn0003598,1,0,1,1,"hypandrium, surstylus / epandrial ventral lobe, cercus﻿",1,1,1,1,1,"hypandrium, phallus, surstylus, epandrial ventral lobe, cercus",32.7,29.72,0,0,Drosophila melanogaster,yw; +; +,tttcagctccccttgcttctgt,cggttggtcacttgcgtttg,TTTCAGCTCCCCTTGCTTCTGTcgatgcagatttgcattcctcggttgtcacaacaccgcatgaatacaataatgggcagaacaataataacgacaaggaaaccgtaccgaaagagccagttaccggggcttcctctgcccaagtgaccatcaatgggagcgccaaagacctgccagagaatatacgccgtatcttaacttccaacCAAACGCAAGTGACCAACCG,286,1.93,2.05,2,2019-01-15,350,95,095_28.jpeg,095_48.jpeg,095_0_00001.jpeg,095_0_00002.jpeg,095_0_00003.jpeg,095_0_00004.jpeg,095_0_00005.jpeg,095_0_00006.jpeg,095_0_00007.jpeg,095_0_00008.jpeg,no_data.jpg,no_data.jpg,no_data.jpg,no_data.jpg,no_data.jpg,no_data.jpg,095_1_00001.jpeg,095_1_00002.jpeg,095_1_00003.jpeg,095_1_00004.jpeg,095_1_00005.jpeg,095_1_00006.jpeg,095_1_00007.jpeg,095_1_00008.jpeg,no_data.jpg,no_data.jpg,no_data.jpg,no_data.jpg,no_data.jpg,no_data.jpg,1,0,0,Male,NA,Su_var_205.zip
96,CG9397,jing,jing,FBgn0086655,1,0,1,1,"hypandrium, surstylus / epandrial ventral lobe, cercus﻿",1,1,1,1,1,"hypandrium, phallus, surstylus, epandrial ventral lobe, cercus",26.6,29.19,0,0,Drosophila melanogaster,yw; +; +,tcagttcccccagcagcagt,tccgattccggttccctttt,TCAGTTCCCCCAGCAGCAGTagcaacggaagccacggtagccacggtatgcgatcctcgccggccctctccacgtcaaactcctgcaccctgtctgcatttagcaagatcaaggtggaaacaacggagctggcttcccagacgggctccctgacctcttcctcaatacctacaatatcacttaagcctcagagcttcgccgggcagctgcccAAAAGGGAACCGGAATCGGA,235.5,1.98,2.17,2,2019-01-15,456,96,096_28.jpeg,096_48.jpeg,096_0_00001.jpeg,096_0_00002.jpeg,096_0_00003.jpeg,096_0_00004.jpeg,096_0_00005.jpeg,096_0_00006.jpeg,096_0_00007.jpeg,096_0_00008.jpeg,no_data.jpg,no_data.jpg,no_data.jpg,no_data.jpg,no_data.jpg,no_data.jpg,096_1_00001.jpeg,096_1_00002.jpeg,096_1_00003.jpeg,096_1_00004.jpeg,096_1_00005.jpeg,096_1_00006.jpeg,096_1_00007.jpeg,096_1_00008.jpeg,no_data.jpg,no_data.jpg,no_data.jpg,no_data.jpg,no_data.jpg,no_data.jpg,1,0,0,Male,NA,jing.zip
97,CG5575,ken and barbie,ken,FBgn0011236,1,1,1,1,"hypandrium, phallus, surstylus / epandrial ventral lobe, cercus﻿",1,1,1,1,1,"hypandrium, phallus, surstylus, epandrial ventral lobe, cercus",40.2,29.18,0,0,Drosophila melanogaster,yw; +; +,aagaccaccgactccgcctatct,gtcctcgtcctcctccttgttgt,AAGACCACCGACTCCGCCTATCTgagcagcaagtgcggcggcctgcgggatcgggccgacaggcggaagcagcagtacaccagcccacagaatttggagccggatcagacgctcaagtacgaggtggacagcgtggatgagtcgcgcaacgccgcggatttctcgtccgccttcaactccaacgacaattgcgagagtgcggccgagtgcgagcggagtggtggccacaACAACAAGGAGGAGGACGAGGAC,289,1.98,2.11,2,2019-01-15,357,97,097_28.jpeg,097_48.jpeg,097_0_00001.jpeg,097_0_00002.jpeg,097_0_00003.jpeg,097_0_00004.jpeg,097_0_00005.jpeg,097_0_00006.jpeg,097_0_00007.jpeg,097_0_00008.jpeg,no_data.jpg,no_data.jpg,no_data.jpg,no_data.jpg,no_data.jpg,no_data.jpg,097_1_00001.jpeg,097_1_00002.jpeg,097_1_00003.jpeg,097_1_00004.jpeg,097_1_00005.jpeg,097_1_00006.jpeg,097_1_00007.jpeg,097_1_00008.jpeg,no_data.jpg,no_data.jpg,no_data.jpg,no_data.jpg,no_data.jpg,no_data.jpg,1,0,0,Male,NA,ken.zip
98,CG5109,Polycomblike,Pcl,FBgn0003044,1,1,1,1,"hypandrium, phallus, surstylus / epandrial ventral lobe, cercus﻿",1,1,1,1,1,"hypandrium, phallus, surstylus, epandrial ventral lobe, cercus",32.2,29.16,0,0,Drosophila melanogaster,yw; +; +,ctgctcaaaggcgtcaactcaa,ggtcaataatggtgcccaggtaaa,CTGCTCAAAGGCGTCAACTCAAtgaagccaagcttcaagaccgtcgaagcagcaccgccaacgccgccaacacctccatcaccaccaccaccgccgccggcaccaccagttgccgctccctcgccagcggtcacgtatgcgcttcaggaggacgtcttcatcaaatgcaacgatggcagatTTTACCTGGGCACCATTATTGACC,225.5,2.01,2.04,2,2019-01-15,135,98,098_28.jpeg,098_48.jpeg,098_0_00001.jpeg,098_0_00002.jpeg,098_0_00003.jpeg,098_0_00004.jpeg,098_0_00005.jpeg,098_0_00006.jpeg,098_0_00007.jpeg,no_data.jpg,no_data.jpg,no_data.jpg,no_data.jpg,no_data.jpg,no_data.jpg,no_data.jpg,098_1_00001.jpeg,098_1_00002.jpeg,098_1_00003.jpeg,098_1_00004.jpeg,098_1_00005.jpeg,098_1_00006.jpeg,098_1_00007.jpeg,098_1_00008.jpeg,no_data.jpg,no_data.jpg,no_data.jpg,no_data.jpg,no_data.jpg,no_data.jpg,1,0,0,Male,NA,Pcl.zip
99,CG17958,Serendipity delta,Sry-delta,FBgn0003512,0,0,0,0,no expression,1,1,1,1,1,"hypandrium, phallus, surstylus, epandrial ventral lobe, cercus",33.9,27.77,0,0,Drosophila melanogaster,yw; +; +,gtgaacctgatgaccacccaga,gtgtcggactcctcctgatcctt,GTGAACCTGATGACCACCCAGAagaggctgacgacccagctaaagggcgctctaaagtccgagttcgaggtgccggagtccggcgaggacatactcgtggaggaggtggagataccccaaagcgatgtcgagacagacgccgatgccgaggcggacgccctgttcgtggagctggtcAAGGATCAGGAGGAGTCCGACAC,205.5,1.95,2.03,2,2019-01-15,357,99,099_28.jpeg,099_48.jpeg,099_0_00001.jpeg,099_0_00002.jpeg,099_0_00003.jpeg,099_0_00004.jpeg,099_0_00005.jpeg,099_0_00006.jpeg,099_0_00007.jpeg,099_0_00008.jpeg,no_data.jpg,no_data.jpg,no_data.jpg,no_data.jpg,no_data.jpg,no_data.jpg,099_1_00001.jpeg,099_1_00002.jpeg,099_1_00003.jpeg,099_1_00004.jpeg,099_1_00005.jpeg,099_1_00006.jpeg,099_1_00007.jpeg,099_1_00008.jpeg,no_data.jpg,no_data.jpg,no_data.jpg,no_data.jpg,no_data.jpg,no_data.jpg,1,0,0,Male,NA,Sry-delta.zip
100,CG9648,Max,Max,FBgn0017578,0,0,0,0,no expression,1,1,1,1,1,"hypandrium, phallus, surstylus, epandrial ventral lobe, cercus",28.1,27.42,0,0,Drosophila melanogaster,yw; +; +,gaggaagtgggcagcgagga,tcacaacttttcgagggctattgctt,GAGGAAGTGGGCAGCGAGGAggccgacgacgaagacctcgaccaggacttcagtagacgcaataaaaagatgaagaccttccacgcatagccgctgatccaatccaaagtgctgcttacaggcgtgttccggcttccgttttcaccgacattctgaattcttacgtggatttagttcaactttgagttgtgttatacgaAAGCAATAGCCCTCGAAAAGTTGTGA,243.5,1.9,2.03,2,2019-01-15,459,100,100_28.jpeg,100_48.jpeg,100_0_00001.jpeg,100_0_00002.jpeg,100_0_00003.jpeg,100_0_00004.jpeg,100_0_00005.jpeg,100_0_00006.jpeg,100_0_00007.jpeg,100_0_00008.jpeg,no_data.jpg,no_data.jpg,no_data.jpg,no_data.jpg,no_data.jpg,no_data.jpg,100_1_00001.jpeg,100_1_00002.jpeg,100_1_00003.jpeg,100_1_00004.jpeg,100_1_00005.jpeg,100_1_00006.jpeg,100_1_00007.jpeg,no_data.jpg,no_data.jpg,no_data.jpg,no_data.jpg,no_data.jpg,no_data.jpg,no_data.jpg,1,0,0,Male,NA,Max.zip
